# A Consensus Model of Glucose-Stimulated Insulin Secretion in the Pancreatic $\beta$ -Cell

Deepa Maheshvare M.<sup>1</sup>, Soumyendu Raha<sup>1</sup>, Matthias König<sup>2,3,\*</sup>, and Debnath Pal<sup>1,3,\*</sup>

<sup>1</sup>Department of Computational and Data Sciences, Indian Institute of Science, Bangalore 560012, India

<sup>2</sup>Institute for Biology, Institute for Theoretical Biology, Humboldt-University Berlin, Philippstraße 13, Berlin, 10115, Germany

<sup>3</sup>equal contribution

Correspondence\*:  
dpal@iisc.ac.in, konigmatt@googlemail.com

## ABSTRACT

The pancreas plays a critical role in maintaining glucose homeostasis through the secretion of hormones from the islets of Langerhans. Glucose-stimulated insulin secretion (GSIS) by the pancreatic  $\beta$ -cell is the main mechanism for reducing elevated plasma glucose. Here we present a systematic modeling workflow for the development of kinetic pathway models using the Systems Biology Markup Language (SBML). Steps include retrieval of information from databases, curation of experimental and clinical data for model calibration and validation, integration of heterogeneous data including absolute and relative measurements, unit normalization, data normalization, and model annotation. An important factor was the reproducibility and exchangeability of the model, which allowed the use of various existing tools. The workflow was applied to construct the first consensus model of GSIS in the pancreatic  $\beta$ -cell based on experimental and clinical data from 39 studies spanning 50 years of pancreatic, islet, and  $\beta$ -cell research in humans, rats, mice, and cell lines. The model consists of detailed glycolysis and equations for insulin secretion coupled to cellular energy state (ATP/ADP ratio). Key findings of our work are that in GSIS there is a glucose-dependent increase in almost all intermediates of glycolysis. This increase in glycolytic metabolites is accompanied by an increase in energy metabolites, especially ATP and NADH. One of the few decreasing metabolites is ADP, which, in combination with the increase in ATP, results in a large increase in ATP/ADP ratios in the  $\beta$ -cell with increasing glucose. Insulin secretion is dependent on ATP/ADP, resulting in glucose-stimulated insulin secretion. The observed glucose-dependent increase in glycolytic intermediates and the resulting change in ATP/ADP ratios and insulin secretion is a robust phenomenon observed across data sets, experimental systems and species. Model predictions of the glucose-dependent response of glycolytic intermediates and insulin secretion are in good agreement with experimental measurements. Our model predicts that factors affecting ATP consumption, ATP formation, hexokinase, phosphofructokinase, and ATP/ADP-dependent insulin secretion have a major effect on GSIS. In conclusion, we have developed and applied a systematic modeling workflow for pathway models that allowed us to gain insight into key mechanisms in GSIS in the pancreatic  $\beta$ -cell.

**Keywords:** glucose-stimulated insulin secretion, GSIS, glycolysis, pancreas, kinetic model, systems biology

## 1 INTRODUCTION

1 The pancreas plays a vital role in maintaining  
2 glucose homeostasis (Woods et al., 2006) through  
3 the secretion of hormones from the islets of

Langerhans. The most important hormones are 4  
insulin, secreted by the pancreatic  $\beta$ -cells, and 5  
glucagon, secreted by the  $\alpha$ -cells, both of which play 6

7 key roles in regulating glucose homeostasis (König  
8 et al., 2012a).

9 Glucose-induced insulin secretion (GSIS) is  
10 a physiological process by which the pancreas  
11 releases insulin in response to an increase in blood  
12 glucose levels. When glucose enters the bloodstream  
13 after a meal, it is taken up by  $\beta$ -cells in the  
14 pancreas through glucose transporters, primarily  
15 GLUT2 (MacDonald et al., 2005). Once inside the  
16  $\beta$ -cells, glucose is metabolized via glycolysis, which  
17 produces energy in the form of ATP.

18 The coupling of glycolysis with the insulin  
19 secretion mechanism in the  $\beta$ -cell is established by  
20 the regulatory effects of glycolytic intermediates  
21 on the levels of energy metabolites such as ATP  
22 and NADH (Newsholme et al., 2014; Prentki  
23 et al., 2013). The rise in ATP levels triggers  
24 a series of events that lead to the release of  
25 insulin. Specifically, the high ATP levels close  
26 ATP-sensitive potassium channels (Ashcroft, 2006),  
27 which leads to depolarization of the cell membrane  
28 and opening of voltage-gated calcium channels. The  
29 influx of calcium triggers the exocytosis of insulin-  
30 containing vesicles, leading to the release of insulin  
31 into the bloodstream (Rorsman and Braun, 2013;  
32 Guerrero-Hernandez and Verkhatsky, 2014). The  
33  $K_{ATP}/Ca^{2+}$  independent signaling mechanisms  
34 and the other metabolites besides glucose contribute  
35 to the amplification of the signaling events that  
36 trigger insulin secretion (Guay et al., 2013).

37 GSIS by the pancreatic  $\beta$ -cell is the primary  
38 mechanism for lowering elevated plasma glucose  
39 levels. The amount of insulin released increases  
40 with the glucose in the bloodstream. This process  
41 is crucial for the regulation of blood glucose levels  
42 by promoting the uptake and use of glucose by cells  
43 throughout the body, such as muscle, fat tissue, and  
44 the liver (Di Camillo et al., 2014; Fritsche et al.,  
45 2008).

46 Glycolysis is the primary metabolic pathway  
47 responsible for GSIS. It involves the uptake of  
48 glucose and its conversion to pyruvate, which is  
49 critical for ATP synthesis and maintenance of ATP  
50 levels. Experimental data from metabolic profiling

studies in islet cells support the key role of glycolysis 51  
in GSIS (Spégel et al., 2013, 2015; Taniguchi et al., 52  
2000). As glucose levels increase, glycolytic flux 53  
and most glycolytic intermediates increase in a dose- 54  
dependent manner. Changes in adenine nucleotide 55  
levels due to variations in glycolytic flux lead 56  
to changes in nucleotide ratios, with increasing 57  
glucose levels resulting in a positive correlation 58  
between the ATP/ADP ratio and  $Ca^{2+}$  response 59  
and insulin release. This trend is consistent across 60  
several studies (Detimary et al., 1996; Malaisse 61  
et al., 1978; Salvucci et al., 2013), including isolated 62  
islets perfused with glucose, rat and mouse tissue 63  
homogenates, and insulin-secreting cell lines. The 64  
increase in ATP/ADP ratio ranges from 2 to 7 65  
when glucose levels are increased from 2.8mM 66  
to 30mM, indicating similar behavior in different 67  
experimental systems studying insulin secretion by 68  
the pancreas (Huang and Joseph, 2014). 69

Mathematical models have been developed 70  
to investigate the metabolic and signaling 71  
mechanisms that trigger and amplify insulin 72  
secretion. Early models of  $\beta$ -cells focused on 73  
examining the relationship between glycolytic 74  
oscillations and pulsatile insulin release to 75  
understand GSIS (Bertram et al., 2007; Tornheim, 76  
1997). Merrins et al. analyzed the oscillations in 77  
glycolytic intermediates (i.e. fructose-6-phosphate, 78  
fructose-2,6-bisphosphate, and fructose-1,6- 79  
bisphosphate) and their effect on pulsatile insulin 80  
secretion (Merrins et al., 2012), while other models 81  
integrated glycolytic flux with mitochondrial ATP 82  
production to study the role of reducing equivalents 83  
such as pyridine nucleotides in enhancing insulin 84  
secretion (Westermarck et al., 2007; Bertram et al., 85  
2006). Jiang et al. further combined previously 86  
developed models of glycolysis, citric acid cycle,  $\beta$ - 87  
oxidation, pentose phosphate shunt, and respiratory 88  
chain and studied the local and global dynamics 89  
of the GSIS mechanism in response to parameter 90  
perturbations. These models were coupled with the 91  
calcium signaling pathway of Fridlyand et al. to 92  
create an integrated metabolic model (Fridlyand 93  
and Philipson, 2010; McKenna et al., 2016). 94

95 To investigate the synergistic insulinotropic effect  
96 of other nutrient sources, Salvucci et al. (Salvucci  
97 et al., 2013) developed a model by integrating  
98 alanine metabolism with glucose metabolism, the  
99 citric acid cycle, and the respiratory chain. Gelbach  
100 et al. developed a system of 65 reactions integrating  
101 glycolysis, glutaminolysis, the pentose phosphate  
102 pathway, the citric acid cycle, the polyol pathway,  
103 and the electron transport chain to study the kinetics  
104 of insulin secretion (Gelbach et al., 2022).

105 However, the majority of these models are based  
106 on earlier models that were developed using kinetic  
107 data from organisms other than humans or non-  
108 pancreatic tissues, such as a glycolysis model that  
109 utilized kinetic data from experiments on yeast cell  
110 extract, or a glycolysis model based on kinetic data  
111 from mammalian muscle (Smolen, 1995). Often,  
112 the data used to build these models is limited and  
113 comes from a single experimental study. In most  
114 models specific to  $\beta$ -cells, reaction kinetics are  
115 described by simple mass-action rate laws. There  
116 exists no detailed kinetic model of the changes  
117 in glycolysis during GSIS that can effectively  
118 integrate the observed changes in glycolytic and  
119 energy intermediates from a wide range of GSIS  
120 experiments.

121 In systems biology and systems medicine,  
122 ensuring the reproducibility of computational  
123 models and integrating diverse data from  
124 multiple sources into these models are critical  
125 challenges. Standards for model description,  
126 such as the Systems Biology Markup Language  
127 (SBML) (Hucka et al., 2015; Keating et al., 2020),  
128 have been developed to enable the reusability  
129 and reproducibility of existing models, but they  
130 have yet to be utilized in the field of pancreatic  
131 GSIS modeling. Furthermore, there is a need to  
132 address how to integrate heterogeneous data from  
133 different studies conducted in different organisms  
134 and experimental systems in the context of GSIS  
135 modeling.

136 This study aims to develop a detailed kinetic model  
137 of GSIS and the associated changes in glycolysis in  
138 the pancreatic  $\beta$ -cell. The novel contributions of this

work include a systematic curation and integration  
of changes in glycolytic metabolites from different  
experimental studies across different species and  
experimental systems. Based on this unique data  
set, a detailed kinetic model of glycolysis and GSIS  
was constructed using a systematic approach with a  
focus on reproducibility. This approach allowed the  
establishment of a consensus model of the changes  
that occur in insulin secretion with varying glucose  
concentrations. The overall goal was to provide a  
better understanding of the mechanisms underlying  
GSIS and to contribute to the development of  
improved computational models of these processes.

## 2 RESULTS

Our study introduces a detailed kinetic model of  
GSIS in the pancreatic  $\beta$ -cell, which has the ability  
to simulate alterations in glycolytic intermediates  
and ATP/ADP ratio due to glucose levels and the  
effect of change in the energy state of the  $\beta$ -cell on  
insulin secretion.

### 2.1 Systematic curation of data set of changes in GSIS

In the course of this study, we compiled a  
comprehensive data set (Tab. 1) of GSIS based  
on experimental and clinical data from 39 studies  
spanning half a century of research on pancreatic,  
islet, and  $\beta$ -cell function in humans, rats, mice,  
and cell lines. Specifically, we systematically  
curated metabolomics data from studies conducted  
between 1970 and 2020, comprising information  
on the concentration of glycolytic intermediates  
and cofactors in both time-course and steady-  
state experiments, as well as the corresponding  
glucose doses. The data set contains 17 metabolites,  
comprising 359 data points from steady-state  
experiments and 249 data points from time-course  
studies. It includes both absolute and relative  
measurements of metabolite changes, and an  
overview of the available information for each  
metabolite and study is presented in Fig. 1.

This data set represents the first open and  
FAIR (findable, accessible, interoperable, and

180 reusable) large-scale collection of data on changes in  
181 glycolysis and insulin secretion in the pancreatic  $\beta$ -  
182 cell during GSIS. We used the absolute and relative  
183 measurements of glycolysis metabolites and insulin  
184 secretion rates in this data set for model calibration  
185 and evaluation.

186 The data set is available under a CC-BY4.0 license  
187 from [https://github.com/matthiaskoenig/pancreas-](https://github.com/matthiaskoenig/pancreas-model)  
188 [model](https://github.com/matthiaskoenig/pancreas-model).

## 189 2.2 Reproducible modeling workflow

190 In this study, we describe a comprehensive  
191 modeling workflow for building small kinetic  
192 pathway models (Fig. 2) using SBML (Hucka et al.,  
193 2015; Keating et al., 2020).

194 In our model-building workflow, we followed  
195 several steps to construct a kinetic SBML model  
196 of glycolysis. A) First, we built an SBML model  
197 based on glycolytic reactions and intermediates from  
198 existing models and pathway databases. B) We then  
199 annotated metabolites and reactions with metadata  
200 information which was extended by querying VMH  
201 and the BiGG database, resulting in mappings  
202 to additional resources such as HMDB, BioCyc,  
203 MetaNetX, ChEBI, and SEED. C) We collected  
204 and retrieved kinetic parameters such as  $K_M$ ,  $K_I$ ,  
205  $K_A$ , and  $K_{eq}$  constants from databases and D)  
206 integrated them with synonyms associated with  
207 each queried metabolite using compound identifier  
208 mapping services. E) We integrated the resulting  
209 parameters and assigned median values to the  
210 model parameters. F) Next, we curated data from  
211 studies reporting metabolite concentrations and  
212 changes, and insulin secretion in pancreatic, islet,  
213 and  $\beta$ -cell lines through a literature search. G)  
214 Unit normalization was then performed to convert  
215 reported metabolite concentrations and insulin  
216 secretion to mmole/l (mM) and nmole/min/ml ( $\beta$ -  
217 cell volume), respectively. H) Data normalization  
218 was performed to remove systematic differences  
219 between data reported in different studies and  
220 experimental systems. I) Next, values for kinetic  
221 parameters, initial concentrations, volumes, rate  
222 equations, and annotations were integrated into

the stoichiometric model. J) We calibrated the 223  
model by parameter optimization using time-course 224  
and steady-state data and K) generated the final 225  
SBML kinetic model using all the information. 226  
L) Finally, we performed model predictions of 227  
glycolytic intermediates and insulin response as a 228  
function of varying glucose concentrations. Steps 229  
were performed iteratively to fill gaps and extend 230  
the data set and model. 231

## 2.3 Computational model 232

Using the established data set, we utilized 233  
the aforementioned workflow to develop the first 234  
consensus model of GSIS in the pancreatic  $\beta$ -cell. 235  
The model is comprised of detailed glycolysis and 236  
equations for insulin secretion which are coupled 237  
to the cellular energy state (ATP/ADP ratio). The 238  
metabolites and reactions incorporated into the 239  
kinetic model are depicted in Fig. 3, and their 240  
biochemical interactions are represented through 241  
a system of ordinary differential equations. The 242  
model consists of 21 enzyme-catalyzed reactions, 243  
25 metabolites, and 91 parameters, and also includes 244  
an empirical model that connects the energy state 245  
of the  $\beta$ -cell to insulin secretion. 246

When glucose levels are high, GLUT transporter 247  
allows glucose to enter the cell, and glucokinase 248  
converts glucose to glucose-6-phosphate. The 249  
upper glycolysis produces fructose-6-phosphate, 250  
fructose-1,6-phosphate, and triose phosphates like 251  
dihydroxyacetone phosphate and glyceraldehyde 252  
phosphate. Lower glycolysis then leads to the 253  
creation of 3-phosphoglycerate, 2-phosphoglycerate, 254  
phosphoenolpyruvate, and pyruvate. Pyruvate can 255  
be transformed into lactate or transported to the 256  
mitochondria. For each glucose molecule, two ATP 257  
molecules are produced. Changes in ATP/ADP ratio 258  
trigger insulin secretion. 259

The SBML model is available 260  
under a CC-BY4.0 license 261  
from [https://github.com/matthiaskoenig/pancreas-](https://github.com/matthiaskoenig/pancreas-model) 262  
[model](https://github.com/matthiaskoenig/pancreas-model). 263



## 264 2.4 Normalization of data

265 The aim of this study was to investigate  
266 variations in glycolysis, glycolytic intermediates,  
267 energy metabolites, and insulin secretion during  
268 GSIS using the established model. In order to  
269 integrate heterogeneous experimental data for each  
270 metabolite and insulin secretion rate, we conducted  
271 a two-step normalization process to standardize  
272 time course and dose-response measurements. The  
273 normalization process involved unit normalization  
274 (as discussed in Sec. 4.7) and data normalization (as  
275 discussed in Sec. 4.8) to normalize the diverse data  
276 and eliminate systematic deviations for individual  
277 studies. We present the case of glucose 6-phosphate  
278 as an example of the normalization process (see  
279 Fig. 4). The experimental curves were converted  
280 to relative (fold) and unit-normalized absolute  
281 measurements (Fig. 4A and Fig. 4B). To combine  
282 the fold data and absolute data, we multiplied  
283 the fold values by the basal concentration to  
284 obtain absolute values (Fig. 4C). If the basal  
285 metabolite concentration was not reported, we  
286 used the mean curve of the absolute data at the  
287 pre-incubation glucose dose of the experiment  
288 to determine the basal value. For metabolites  
289 consisting of only relative measurements, we used  
290 the half-saturation  $K_m$  value of the metabolite as  
291 an estimate for the basal concentration. Using  
292 this strategy, we converted all fold-changes and  
293 time courses to absolute data with standardized  
294 units, which was then combined with the existing  
295 absolute data. However, the standard deviation of  
296 the combined data set measurements was high, and  
297 large systematic differences between studies could  
298 be observed. We determined scaling factors for  
299 every study to minimize the difference between  
300 all studies based on least-squares minimization (as  
301 discussed in Sec. 4.8.1). The resulting normalized  
302 data (Fig. 4D) was then used for model calibration.  
303 We applied this procedure to all metabolites in the  
304 model as well as the insulin secretion rate, reducing  
305 the variability in the data substantially.

## 2.5 Changes in glycolytic metabolites and insulin secretion in GSIS 306 307

Our work has uncovered several key findings 308 related to GSIS. First, we found that almost all 309 glycolytic intermediates increase in a glucose- 310 dependent manner across a wide range of glucose 311 concentrations, as illustrated in Figures 5, 6, and 312 7. This increase in glycolytic intermediates is 313 accompanied by a corresponding increase in energy 314 metabolites, especially ATP and NADH. However, 315 one notable exception is ADP, which decreases 316 with increasing glucose levels. As a result, there 317 is a significant increase in ATP/ADP ratios in 318  $\beta$ -cells with increasing glucose, a key factor in 319 insulin secretion. This phenomenon is robust across 320 different data sets, experimental systems, and 321 species. An important observation is that not only 322 ATP and NADH increase with increasing glucose, 323 but also the total ATP (ATP + ADP) and total 324 NADH (NAD + NADH). 325

Our model was able to predict the glucose- 326 dependent response of glycolytic intermediates 327 and insulin secretion with good agreement to 328 most experimental measurements, as summarized 329 in Table 1. We observed a dose-dependent 330 increase in glycolytic intermediates when glucose 331 concentrations were increased from 0.01 mM to 332 35 mM. The model predicts that steady states of 333 glycolytic metabolites under constant glucose are 334 reached after approximately 20 minutes, with only 5- 335 10 minutes required to reach steady state according 336 to our simulations. 337

Figure 8A illustrates the relationship between 338 glucose dose and insulin release, while Figure 8B 339 shows the effect of varying the ATP/ADP ratio 340 on the insulin response. Specifically, the ATP 341 and ADP concentrations of the  $\beta$ -cell increase and 342 decrease, respectively, with the external glucose 343 dose, resulting in an increased ATP/ADP ratio 344 that triggers insulin release. The model is able 345 to reproduce the steady-state insulin secretion 346 depending on glucose concentration, but fails to 347 describe the fast initial insulin release. 348

## 349 2.6 Sensitivity analysis of parameters 350 affecting GSIS

351 To determine how the model parameters affect  
352 the rate of insulin release, we performed a local  
353 sensitivity analysis (Sauro, 2020). Figure 8C shows  
354 the sensitivity of insulin flux to a 10% change  
355 in model parameter values at different glucose  
356 concentrations. The rate of insulin secretion depends  
357 on the ATP/ADP ratio, so perturbing parameters  
358 that affect ATP formation and consumption has  
359 strong effects. Figure 8D shows the highly sensitive  
360 parameters that have positive and negative effects  
361 on insulin secretion, including factors affecting  
362 ATP consumption, ATP formation, hexokinase,  
363 phosphofructokinase, and ATP/ADP-dependent  
364 insulin secretion.

365 In conclusion, our systematic pathway modeling  
366 workflow provides insights into the key mechanisms  
367 of GSIS in the pancreatic  $\beta$ -cell.

## 3 DISCUSSION

368 We have developed a comprehensive kinetic  
369 model of GSIS in the pancreatic  $\beta$ -cell that can  
370 simulate glucose-dependent changes in glycolytic  
371 intermediates, ATP/ADP ratio, and their effect  
372 on insulin secretion. The main objective of this  
373 study was to establish a standardized workflow for  
374 data integration and normalization to construct a  
375 tissue-specific model of glycolysis and GSIS in the  
376  $\beta$ -cell. Although we did not model other important  
377 pathways related to ATP homeostasis, such as the  
378 citric acid cycle, the pentose phosphate pathway,  
379 and the respiratory chain, our workflow can be  
380 easily extended to include them. Incorporating  
381 these pathways into our model will enable us to  
382 explicitly model the regulatory effect of downstream  
383 metabolites on the ATP/ADP ratio and insulin  
384 secretion. Previous studies have shown that fatty  
385 acids and amino acids can also induce insulin  
386 secretion in addition to glucose. Therefore, linking  
387 glucose metabolism with fatty acid and amino  
388 acid metabolism could help in understanding the  
389 insulinotropic effects of other fuel sources.

The increase in ATP levels triggers a cascade 390  
of events that culminate in the release of 391  
insulin from  $\beta$ - cells. Precisely, high ATP levels 392  
prompt the closure of ATP-sensitive potassium 393  
channels (Ashcroft, 2006). Consequently, the 394  
cell membrane depolarizes, opening voltage-gated 395  
calcium channels, which allows calcium influx. The 396  
influx of calcium triggers exocytosis of insulin- 397  
containing vesicles, leading to the release of insulin 398  
into the bloodstream (Rorsman and Braun, 2013; 399  
Guerrero-Hernandez and Verkhratsky, 2014). These 400  
electrophysiological changes resulting in insulin 401  
secretion were not modeled explicitly, but the 402  
effect of the ATP/ADP ratio on insulin secretion 403  
was modeled using a phenomenological (Hill-type) 404  
expression. Consequently, the model's predictive 405  
capacity is limited to the steady-state glucose- 406  
insulin secretion dynamics. Expanding the model 407  
to explicitly describe these phenomena would 408  
allow to study experimentally observed patterns 409  
such as biphasic insulin secretion (Pedersen et al., 410  
2008). Of note, the dynamics changing glycolytic 411  
intermediates were correctly described by the 412  
model. 413

Although our model has some limitations, it 414  
represents the first data-driven approach to integrate 415  
information from diverse sources and experimental 416  
setups. Moreover, it provides the first systematic 417  
analysis of the glycolytic changes that occur during 418  
insulin secretion in response to different glucose 419  
levels. Our study reveals that in GSIS, almost 420  
all glycolytic intermediates increase in a glucose- 421  
dependent manner as do total ATP and NADH, 422  
which is a significant finding. 423

Our model was developed to address the 424  
limitations of existing pancreatic  $\beta$ -cell models 425  
of glucose-insulin kinetics. These models often 426  
suffer from several drawbacks such as limited 427  
evaluation to a single data set, non-standardized 428  
formats of experimental data and kinetic parameters, 429  
and non-reproducible formats. To overcome these 430  
limitations, we have created open, free, and FAIR 431  
assets that can be used for the study of pancreatic 432  
physiology and GSIS. These assets include a fully 433  
reproducible SBML model of pancreatic  $\beta$ -cell 434

435 glycolysis, a data curation workflow, strategies for  
436 unit and data normalization, and a large database  
437 of metabolic data of the pancreatic  $\beta$ -cell. Our  
438 systematic model-building workflow can be used as  
439 a blueprint to construct reproducible kinetic models  
440 of cell metabolism.

441 Computational modeling faces a significant  
442 challenge due to the substantial variation in data  
443 across different experimental systems, species, and  
444 cell lines. Often, relative data instead of absolute  
445 data is reported, further complicating the task  
446 of data integration. In this study, we developed  
447 a reliable data normalization workflow that was  
448 applied to experimental and clinical data from  
449 39 studies conducted over the past 50 years on  
450 pancreatic, islet, and  $\beta$ -cell function in various  
451 species and cell lines. Our approach substantially  
452 reduced data heterogeneity and revealed a highly  
453 consistent response in glycolytic metabolites and  
454 insulin secretion. The high degree of conservation  
455 in the system of GSIS may have contributed to  
456 the effectiveness of the normalization workflow, as  
457 similar mechanisms are at play in different species,  
458 and the general changes can be observed across  
459 various experimental systems.

460 The study has laid a strong groundwork for  
461 enhancing our comprehension of the underlying  
462 reasons behind impaired insulin secretion. By  
463 mapping proteomics or transcriptomics data onto  
464 specific pathways, the developed model could be  
465 utilized to gain further insight into changes in GSIS,  
466 for instance in diabetic patients.

467 Furthermore, this model can serve as a crucial  
468 component for physiological whole-body models  
469 of glucose homeostasis, allowing researchers to  
470 investigate the relationship between insulin release  
471 and glucose uptake by insulin-responsive tissues.

472 In conclusion, this study utilized a systematic  
473 modeling workflow to gain insight into the key  
474 mechanisms involved in glucose-stimulated insulin  
475 secretion (GSIS) in pancreatic  $\beta$ -cells. When  
476 extended for translational purposes in clinical  
477 settings, it can serve to create reference models to  
478 identify variations in subjects which can lead to

useful inferences regarding underlying metabolic 479  
conditions with therapeutic relevance. 480

## 4 METHODOLOGY

The workflow for building the kinetic model is 481  
illustrated in Fig. 2, with the following sections 482  
providing information on the individual steps. 483

### 4.1 Stoichiometric model 484

Chemical formulas and charges were assigned 485  
to all metabolites, and reactions were examined 486  
to ensure that they maintained mass and charge 487  
balance. The kinetic model encompasses glycolytic 488  
reactions and correlates the energy status of the  $\beta$ - 489  
cell with insulin secretion. sbmlutils (König, 2022c) 490  
was used to create and validate the model, while 491  
cy3sbml (König et al., 2012b) was used to confirm 492  
its coherence. The mass and charge balance of the 493  
system was verified using cobrapy (Ebrahim et al., 494  
2023). 495

### 4.2 Metadata integration 496

Adding semantic annotations to models 497  
is an essential aspect of improving their 498  
interoperability and reusability, as well as 499  
facilitating data integration for model validation 500  
and parameterization (Neal et al., 2019, 2020). 501  
To describe the biological and computational 502  
significance of models and data in a machine- 503  
readable format, semantic annotations are encoded 504  
as links to knowledge resource terms. Open 505  
modeling and exchange (OMEX) metadata 506  
specifications were employed to annotate model 507  
compartments, species, and reactions with metadata 508  
information (Fig. 2B). 509

### Case study: Phosphoglycerate kinase

The enzyme phosphoglycerate kinase (PGK) catalyses the conversion of 1,3-biphosphoglycerate (*bpg13*) and ADP to form 3-phosphoglycerate (*pg3*) and ATP.

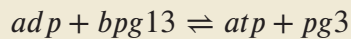

In our model, PGK is described by the following annotations:

SBO:0000176, vmhreaction/PGK,  
bigg.reaction/PGK,  
kegg.reaction/R01512, ec-code/2.7.2.3,  
biocyc/META:PHOSGLYPHOS-RXN,  
uniprot:P00558, uniprot:P07205.

510

511 The model components, including physical  
512 volumes, reactions, metabolites, and kinetic-rate  
513 laws, were annotated using Systems Biology  
514 Ontology (SBO) terms, which describe the  
515 computational or biological meaning of the model  
516 and data (Courtot et al., 2011). Biomedical  
517 ontology services such as Ontology Lookup Service  
518 (OLS) (Cote et al., 2010), VMH (Noronha et al.,  
519 2019), and BiGG (King et al., 2016) were used  
520 to collect these terms. Additional information for  
521 species and reactions were gathered from various  
522 databases such as HMDB, BioCyc, MetaNetX,  
523 ChEBI, and SEED. For instance, the model's  
524 metabolites were annotated with identifiers from  
525 VMH, BiGG, KEGG, HMDB, BioCyc, ChEBI,  
526 MetaNetX, and SEED, while reactions were  
527 annotated with VMH, Rhea, MetaNetX, SEED,  
528 BiGG, BioCyc, and KEGG identifiers (Hari and  
529 Lobo, 2022). Enzymes catalyzing reactions were  
530 annotated with identifiers from enzyme commission  
531 (EC) numbers, UniProt (The UniProt Consortium,  
532 2017), and KEGG. Finally, the annotations  
533 were incorporated into the SBML file using  
534 sbmlutils (König, 2022c) and pymetadata (König,  
535 2022b).

### Case study: 1,3-biphosphoglycerate

There is currently a bottleneck in data integration due to the use of multiple synonyms to refer to a single compound in data repositories. For instance, *bpg13* is identified by different names in SABIO-RK (*Glycerate 1,3-bisphosphate, 3-phospho-D-glyceroyl phosphate*) and BRENDA (*3-phospho-D-glyceroyl phosphate*). Additionally, the labeling of *1,3-biphosphoglycerate*, abbreviated as *DPG*, varies across existing  $\beta$ -cell models (e.g., *1,3-bisphospho-D-glycerate* in (Jiang et al., 2007) and *1,3-biphosphoglycerate* in (Salvucci et al., 2013)). Overall, *bpg13* is associated with seven synonyms: *1,3-Bisphospho-D-glycerate*, *13dpg*, *3-Phospho-D-glyceroylphosphate*, *Glycerate 1,3-bisphosphate*, *3-phospho-d-glyceroyl-phosphate*, *1,3-diphosphoglyceric acid*, *3-Phospho-D-glyceroyl phosphate*. This issue makes it difficult to integrate data and information from different resources, highlighting the need to link chemical entities in the model to knowledge resource terms.

In our model, *bpg13* is clearly described by the following metadata annotations: SBO:0000247, vmhmetabolite/13dpg, bigg.metabolite/13dpg, kegg.compound/C00236, biocyc/META:DPG, CHEBI:16001, inchikey:LJQLQCAXBUHEAZ-UWTATZPHSA-N.

The formula and charge of *bpg13* are  $C_3H_4O_{10}P_2$  and -4, respectively.

536

## 4.3 Kinetic parameters

537

Kinetic parameters, such as half-saturation  
538 constants ( $K_M$ ), inhibition constants ( $K_I$ ),  
539 activation constants ( $K_A$ ), and equilibrium  
540 constants ( $K_{eq}$ ), were gathered from literature  
541 and a variety of databases (see Fig. 2C).  
542 Values were programmatically accessed  
543



544 from UniProt (The UniProt Consortium,  
545 2017), BRENDA (Placzek et al., 2017) using  
546 brendapy (König, 2022a), and SABIO-RK (Wittig  
547 et al., 2018). These databases were searched  
548 using an organism's NCBI taxonomy identifier  
549 and reaction EC number as input search terms.  
550 Various parameters, including measurement type  
551 ( $K_m$ ,  $K_i$ , and  $K_a$ ), experimental conditions (pH,  
552 temperature), KEGG reaction identifiers, enzyme  
553 type (wildtype or mutant), associated metabolite  
554 identifiers (SABIO compound name or BRENDA  
555 ligand id), UNIPROT identifiers associated with the  
556 isoforms of an enzyme, source tissue, and details  
557 of data source (PubMed identifier) were obtained.  
558 Since there is limited availability of kinetic data  
559 for *Homo sapiens*, we also searched for parameter  
560 values reported in studies of animal species that are  
561 closely related to humans and utilized them if no  
562 data were available for humans.

#### 563 4.4 Synonym mapping

564 To map compound synonyms associated with  
565 each queried metabolite, we utilized compound  
566 identifier mapping services and available metadata  
567 annotations. First, we associated the name of each  
568 compound with internal database identifiers, such  
569 as the internal identifier of Glycerone-phosphate in  
570 SABIO, which is 28. Then, we linked the internal  
571 identifiers to external identifiers, such as those  
572 from ChEBI and KEGG. The external identifiers  
573 associated with the SABIO ligand identifier were  
574 obtained from cross-ontology mappings available  
575 in SABIO-RK. Similarly, we queried the REST  
576 API of UniChem to obtain the external identifiers  
577 associated with the BRENDA ligand identifier. By  
578 doing so, we were able to map most of the kinetic  
579 parameters to their respective compounds (Fig. 2D).

#### 580 4.5 Model parameters

581 For each parameter in the model, the median  
582 value was calculated after synonym mapping  
583 and the values were assigned to the model  
584 parameters, see Fig. 2E. This was performed for  
585 initial concentrations, equilibrium  $K_{eq}$  constants,

half-saturation constants  $K_m$ , inhibition  $K_i$ , and 586  
activation  $K_a$  constants. 587

#### 4.6 Data curation 588

The next step involved curating data from 589  
studies that reported metabolite values, insulin 590  
secretion, or maximal velocities of glycolytic 591  
reactions  $V_{max}$  in pancreatic, islet, and  $\beta$ -cell 592  
lines (Fig. 2F). Relevant studies were identified 593  
through a literature search in PubMed, with a 594  
focus on time course and dose-response profiles 595  
of metabolite concentrations for metabolites 596  
and insulin secretion. Tissue homogenates were 597  
prepared by isolating islets from rodents, humans, or 598  
insulin-secreting cell lines (see Tab. 1). Assays were 599  
performed by stimulating the medium with various 600  
pre-incubation and incubation concentrations of 601  
glucose. To curate the data, established curation 602  
workflows from PK-DB (Grzegorzewski et al., 603  
2021b), which were applied in a recent meta- 604  
analysis (Grzegorzewski et al., 2021a), were used. 605  
The numerical data was digitized by extracting 606  
the data points from the figures and tables using 607  
WebPlotDigitizer (Rohatgi, 2021). The incubation 608  
time and glucose concentration of the stimulation 609  
medium were recorded for all measurements, and 610  
meta-information such as organism and tissue type 611  
were documented. 612

The data is available under a CC-BY 4.0 license 613  
from [https://github.com/matthiaskoenig/pancreas-](https://github.com/matthiaskoenig/pancreas-model) 614  
[model](https://github.com/matthiaskoenig/pancreas-model). In this study, version 0.9.5 of the data set is 615  
used (Deepa Maheshvare and König, 2023). 616

#### 4.7 Unit normalization 617

The data measured in different studies is 618  
often reported in different units. Therefore, unit 619  
normalization was performed to integrate the data 620  
and convert metabolite concentrations and insulin 621  
secretion to standardized units of mmole/l (mM) 622  
and nmole/min/ml ( $\beta$ -cell volume), respectively 623  
(Fig. 2G). 624

Absolute measurements reported in metabolic 625  
profiling studies were found in various units such 626  
as per gram DNA, per gram wet weight or dry 627

628 weight of the islet tissue, per cell, per islet, 629 etc. To use these values for model calibration, 630 both the absolute and relative measurements were 631 first converted to concentration units in mM. The 632 absolute values were converted to model units 633 by multiplying the raw values with appropriate 634 unit conversion factors. For instance, the islet 635 content of glucose 6-phosphate, G6P, (pmol/islet) 636 was converted to concentration units (mM) using 637 the distribution volume of water in the islet 638 (2nl/islet) (Ashcroft et al., 1970) as the conversion 639 factor. Relative measurements were mainly reported 640 with reference to a basal concentration. These 641 relative measurements were converted to absolute 642 quantity by multiplying the fold values with the 643 respective metabolite concentration at the basal or 644 pre-incubation concentration of glucose.

#### 645 4.8 Data normalization and integration

646 Data collected from experiments performed in 647 different laboratories, under different experimental 648 conditions, and with different animal species 649 showed significant variability after unit 650 normalization. Therefore, data normalization was 651 performed to eliminate systematic discrepancies 652 between data reported in different studies (as 653 shown in Fig. 2H). To achieve this, least squares 654 optimization was used to minimize the distance 655 between individual experimental curves and 656 the weighted average of all curves for a given 657 metabolite. The data normalization process involved 658 a two-step procedure in which the steady-state 659 data were first normalized for each metabolite. 660 The resulting steady-state normalization was then 661 used to normalize the time course data for that 662 metabolite (see Fig. 4 for the example of glucose-6 663 phosphate).

##### 664 4.8.1 Steady-state data normalization

665 Steady-state (ss) experiments consisted of pre- 666 incubation with one glucose dose followed 667 by incubation with another glucose dose. 668 The steady state data of the experiment  $\alpha$ , 669  $(c_0^\alpha, c_1^\alpha, \dots, c_n^\alpha)$  observed at  $n$  incubation glucose 670 doses  $(d_0^\alpha, d_1^\alpha, \dots, d_n^\alpha)$  is expressed by the piecewise

linear-interpolation function  $C^{ss}$ . Here,  $\alpha$  belongs 671 to the set of steady-state experiments  $1 \leq \alpha^{ss}$  with 672  $N^{\alpha^{ss}}$  being the number of steady-state experimental 673 curves of the metabolite  $s$ . 674

*Mean curve.* The mean steady-state curve  $\overline{C^{ss}}$  675 of each metabolite  $s$  is calculated as the weighted 676 average of all experimental curves. The data points 677 of the mean curve were interpolated using a 678 piecewise smooth spline function. For data sets 679 consisting of 2 data points, a linear interpolation 680 was used. 681

We formulate a least-squares optimization 682 problem to minimize the distance between the 683 individual experimental curves and the mean 684 curve  $\overline{C^{ss}}$ . The cost function  $\mathbf{F}$  of the optimization 685 problem is given by, 686

$$F(f^\alpha) = \sum_{i=1}^n (f^\alpha \cdot C^{ss}(d_i^\alpha) - \overline{C^{ss}}(d_i^\alpha))^2 \quad (1)$$

In Eq. 1,  $C^{ss}(d_i^\alpha)$  and  $\overline{C^{ss}}(d_i^\alpha)$  are the function 687 values of the individual and mean interpolation 688 function at the  $i^{th}$  value of the glucose dose.  $N$  is 689 the number of glucose values in the dose-response 690 curve of the experiment  $\alpha$ . 691

For each experimental curve, the factor  $f^\alpha$  was 692 determined so that the residual error in Eq. 1 is 693 minimized. The residual error is minimum at the 694 point where the derivative of the cost function  $\mathbf{F}$  695 is zero. Taking the partial derivative of Eq. 1 with 696 respect to the scale transformation parameter gives 697 factor  $f^\alpha$  of the experimental curve  $\alpha$  (Eq. 2). 698

$$f^\alpha = \frac{\sum C^{ss}(d_i^\alpha) \overline{C^{ss}}(d_i^\alpha)}{\sum (C^{ss}(d_i^\alpha))^2} \quad (2)$$

The scale factors of all steady state curves 699  $(f^1, \dots, f^{N^{\alpha^{ss}}})$  were determined by minimizing 700 the respective cost functions  $(F(f^1), \dots, F(f^{N^{\alpha^{ss}}}))$ . 701 Multiplying the experimental curve  $C^\alpha$  by the 702 scaling factor  $f^\alpha$  shifts the experimental curve 703 towards the mean curve. A new mean curve can 704

705 be calculated with the scaled data. The curves were  
706 scaled iteratively until all  $f^\alpha$  converged.

#### 707 4.8.2 Time course data normalization

708 Time course (tc) experiments consisted of pre-  
709 incubation with one glucose dose followed by  
710 incubation with another glucose dose. The time-  
711 dependent data of the time course experiment  
712  $\beta$  ( $c_0^\beta, c_1^\beta, \dots, c_m^\beta$ ) observed at  $m$  time points  
713 ( $t_0^\beta, t_1^\beta, \dots, t_m^\beta$ ) is expressed by the piecewise linear-  
714 interpolation function  $C^\beta$ . Here,  $\beta$  belongs to the  
715 set of time course experiments  $1 \leq \beta \leq N^{\beta_{tc}}$  with  
716  $N^{\beta_{tc}}$  being the number of time course experimental  
717 curves of the metabolite  $s$ . For normalization, each  
718 time course was scaled by a factor  $f^\beta$ .

719 For a given incubation glucose dose  $d^\beta$ , the  
720 metabolite concentration at the last time point  
721  $C^{tc}(t_m)$  corresponds to the steady state value reached  
722 for the given  $d^\beta$

$$f^\beta \cdot C^{tc}(t_m) - \overline{C^{ss}}(d^\beta) = 0 \quad (3)$$

723 The scaling factor for the time course experiment  
724 follows as

$$f^\beta = \frac{\overline{C^{ss}}(d^\beta)}{C^{tc}(t_m)} \quad (4)$$

#### 725 4.9 Model inputs

726 The SBML model was generated by specifying  
727 initial concentrations, rate expressions, parameter  
728 values, and compartmental volumes as the model  
729 inputs, see Fig. 2I.

730 *Volume.* The physical volume of the cytoplasmic  
731 compartment and the  $\beta$ -cell volume were obtained  
732 from the values reported in a morphometric study  
733 of  $\beta$ -cells (Dean, 1973).

734 *Initial concentrations.* The initial concentrations  
735 of glycolytic intermediates were obtained from  
736 the mean curve  $\overline{C^{ss}}$  (Sec. 2.1) at a basal glucose  
737 concentration of 3 mM. The initial value of glucose  
738 in the external/blood compartment is 3 mM.

The initial concentrations of cofactors were 739  
expressed as polynomial functions passing through 740  
the data points of the mean curve, which is computed 741  
as the weighted average of data normalized 742  
experimental curves (Sec. 2.1). In the SBML model, 743  
the polynomial expressions were defined using 744  
assignment rules. 745

*Kinetic constants.* The median values of the 746  
half-saturation or Michaelis-Menten constants  $K_m$  747  
(Sec. 4.5), were assigned to the model parameters. 748

*Equilibrium constants.* The values of the 749  
equilibrium constants  $K_{eq}$  were collected 750  
from NIST (Goldberg and Tewari, 2003) and 751  
EQUILIBRATOR (Noor et al., 2013). 752

*Model equations.* For all the glycolytic reactions, 753  
the biochemical interactions were expressed using 754  
modular rate laws (Liebermeister et al., 2010) of the 755  
form Eq. 5. 756

$$v = \frac{V_{max} \prod_i a_i \left(1 - \frac{\Gamma}{K_{eq}}\right)}{\prod_i (1 + a_i) + \prod_j (1 + b_j) - 1} \quad (5)$$

Here,  $a_i$  is  $S_i/Km_s$ ,  $b_i$  is  $P_i/Km_p$ , S refers to 757  
the substrate and P refers to the product.  $K_{eq}$  is 758  
the equilibrium constant and  $\Gamma$  is the mass-action 759  
ratio (Liebermeister et al., 2010). 760

The use of detailed mechanistic rate laws was 761  
avoided due to the challenges associated with 762  
finding a large number of parameter values. 763

Insulin secretion was modeled via a 764  
phenomenological equation depending on 765  
ATP/ADP ratio. The insulin release flux given 766  
by Eq. 6, is characterized by three parameters, 767  
the maximal rate of insulin release  $V_{max}$ , the Hill 768  
coefficient  $n$ , and  $K_m$  the ratio of ATP/ADP that 769  
results in half-maximal insulin release. 770

$$v^{IRS} = V_{max}^{IRS} \frac{\left(\frac{ATP}{ADP}\right)^n}{\left(K_m\right)^n + \left(\frac{ATP}{ADP}\right)^n} \quad (6)$$

771 *Boundary metabolites and reactions.* Species  
772 in the external and mitochondrial compartments  
773 were assumed to be boundary species with  
774 constant concentrations, i.e. glucose and lactate  
775 in the external compartment and pyruvate in the  
776 mitochondrial compartment were held constant.  
777 Some boundary reactions were modeled as  
778 irreversible reactions, i.e. the export of lactate and  
779 the transport of pyruvate in the mitochondrion.

780 *Metabolites determined by rate rules.* To account  
781 for glucose-dependent changes in the concentrations  
782 of phosphate, NAD, and NADH, polynomial  
783 functions were used to express the concentrations  
784 as rate rules. This approach ensured that the  
785 concentration of fixed metabolites in the system  
786 increased as a function of glucose dose.

787 *Changes in total adenine nucleotides.* The sum  
788 of adenine nucleotides ( $ATP + ADP = ATP_{tot}$ )  
789 changes with glucose. To account for these changes,  
790 a reaction  $\Delta ATP$  was added that changes the total  
791 ATP according to the observed steady-state data for  
792 a given glucose value (Eq. 7).

$$\Delta ATP = f(ATP_{tot}(glc) - (ATP + ADP)) \quad (7)$$

793 The  $ATP_{tot}(glc)$  values are determined by the  
794 interpolating polynomial of the mean steady-state  
795 glucose dose response of the ATP+ADP data.

#### 796 4.10 Model calibration

797 The normalized time-course and steady-state data was  
798 used for model calibration and parameter estimation  
799 (Fig. 2J). An overview of the subset of data used for  
800 model calibration is shown in Fig. 1. The following  
801 data were not used: NADH and NAD were fixed  
802 metabolites in the model, with NAD/NADH and  
803 NADH+NAD calculated from the metabolites. Total  
804 ATP was calculated by summing ATP and ADP, and  
805 ATP ratio was calculated by finding the ratio. The insulin  
806 secretion rate (IRS) was used to derive the parameters  
807 of the IRS function.

808 A subset of the  $V_{max}$  parameters was optimized to  
809 minimize the error between model predictions and

experimental observations. The cost function is given by 810  
the sum of squares of residuals 811

$$F(\mathbf{P}) = \sum_{\alpha,s} (\mathbf{c}_s^\alpha - \mathbf{c}_s^{\mathcal{M}}(\mathbf{P}))^2 \quad (8)$$

In Eq. 8,  $\mathbf{c}_s^\alpha$  is the concentration of the metabolite 812  
 $s$  in the experiment  $\alpha$  and  $\mathbf{c}_s^{\mathcal{M}}$  is the concentration 813  
of the metabolite  $s$  predicted by the model  $\mathcal{M}$ .  $\mathbf{P}$  814  
is the set of 16 parameters of maximum reaction 815  
rates  $V_{max}$ . The experimental data of all transient 816  
metabolites in the model were stored in spreadsheets. 817  
The parameter estimation simulation experiments were 818  
set up using basiCO (Bergmann, 2023), the Python 819  
interface of COPASI (Hoops et al., 2006). The incubation 820  
glucose concentration and incubation time were mapped 821  
to the independent variable ( $glc_{ext}$ , glucose in the 822  
external compartment) and model time, respectively. 823  
The transient metabolites were assigned to the model 824  
elements as dependent variables. The mean values of 825  
 $V_{max}$  calculated from the curated values of the enzyme 826  
activities were assigned as initial values. The lower 827  
and upper bounds specified for the reaction rates  $V_{max}$  828  
were set to 0 and 10000, respectively. The calculations 829  
were performed using Cloud-COPASI, the front-end to 830  
a computer cluster at the Centre for Cell Analysis and 831  
Modelling. Cloud-COPASI is an extension of Condor- 832  
COPASI (Kent et al., 2012). 400 iterations of parameter 833  
estimation were performed on Cloud-COPASI using the 834  
SRES algorithm, a global optimization method. The 835  
optimal values of the parameter set were obtained from 836  
the iteration that yielded the minimum objective value 837  
and updated in the model. 838

#### 4.11 Kinetic model and model predictions 839

All information was written into the model, validation 840  
was performed using sbmlutils, and model simulations 841  
were performed, see Fig. 2K, L. 842

Finally, we performed model predictions of 843  
glycolytic intermediates and insulin response as a 844  
function of varying glucose concentrations. The set of 845  
differential equations was numerically integrated using 846  
basiCO (Bergmann, 2023) based on COPASI (Hoops 847  
et al., 2006) and sbmlsim (König, 2021) based on 848  
libroadrunner (Welsh et al., 2023; Somogyi et al., 849



850 2015). For the glucose dose-response, glucose was  
851 varied as `linspace(0.01, 35, num=11)` and  
852 the model was simulated to steady-state. For the time  
853 course simulations, glucose was varied identically and  
854 simulations were run for 60 min. Simulations were  
855 performed either with COPASI or independently using  
856 libroadrunner to ensure reproducibility of key model  
857 results.

858 The model is available in SBML (Hucka et al.,  
859 2019; Keating et al., 2020) under a CC-BY 4.0 license  
860 from [https://github.com/matthiaskoenig/pancreas-](https://github.com/matthiaskoenig/pancreas-model)  
861 [model](https://github.com/matthiaskoenig/pancreas-model). In this study, version 0.9.5 of the model is  
862 presented (Deepa Maheshvare and König, 2023).

## CONFLICT OF INTEREST STATEMENT

863 The authors declare no competing interests.

## AUTHOR CONTRIBUTIONS

864 DM, SR, MK, and DP conceived and designed the  
865 study. DM and MK developed and implemented the  
866 computational model and data normalization workflow,  
867 and performed the analysis. DM curated the experimental  
868 data, performed parameter estimation, and drafted  
869 the initial version of the manuscript. All authors  
870 read, discussed the results, revised, and approved the  
871 manuscript.

## FUNDING

872 Research of DM was supported by the Senior Research  
873 Fellowship from the Ministry of Human Resource  
874 Development (MHRD), Government of India. MK  
875 was supported by the Federal Ministry of Education  
876 and Research (BMBF, Germany) within the research  
877 network Systems Medicine of the Liver (LiSyM,  
878 grant number 031L0054) and ATLAS (grant number  
879 031L0304B) and by the German Research Foundation  
880 (DFG) within the Research Unit Program FOR 5151  
881 "QuaLiPerF (Quantifying Liver Perfusion-Function  
882 Relationship in Complex Resection - A Systems  
883 Medicine Approach)" by grant number 436883643 and  
884 grant number 465194077 (Priority Programme SPP  
885 2311, Subproject SimLivA). This work was supported  
886 by the BMBF-funded de.NBI Cloud within the German

Network for Bioinformatics Infrastructure (de.NBI) 887  
(031A537B, 031A533A, 031A538A, 031A533B, 888  
031A535A, 031A537C, 031A534A, 031A532B). 889

## ACKNOWLEDGMENTS

DM thanks Dr. Murthy Madiraju S.R., Montreal Diabetes 890  
Research Center, CRCHUM, Montréal, Canada, Dr. 891  
Pedro Mendes, University of Connecticut, and Dr. Frank 892  
Bergmann, University of Heidelberg for the invaluable 893  
discussions. Access to Cloud-COPASI is supported by 894  
NIH Grant R24 GM137787 from the National Institute 895  
for General Medical Sciences. 896

## REFERENCES

- Akhtar, M. S., Verspohl, E., Hegner, D., and 897  
Ammon, H. P. (1977). 6-Phosphogluconate/glucose- 898  
6-phosphate ratio in rat pancreatic islets during 899  
inhibition of insulin release by exogenous insulin. 900  
*Diabetes* 26, 857–863. doi:10.2337/diab.26.9.857 901
- Alcazar, O. and Buchwald, P. (2019). Concentration- 902  
Dependency and Time Profile of Insulin Secretion: 903  
Dynamic Perifusion Studies With Human and Murine 904  
Islets. *Frontiers in Endocrinology* 10, 680. doi:10. 905  
3389/fendo.2019.00680 906
- Ammon, H. P., Bacher, M., Brändle, W. F., Waheed, A., 907  
Roefeldt, M., el-Sayed, M. E., et al. (1998). Effect of 908  
forty-eight-hour glucose infusion into rats on islet ion 909  
fluxes, ATP/ADP ratio and redox ratios of pyridine 910  
nucleotides. *The Journal of Endocrinology* 156, 583– 911  
590. doi:10.1677/joe.0.1560583 912
- Ammon, H. P., Hoppe, E., Akhtar, M. S., and 913  
Niklas, H. (1979). Effect of leucine on the 914  
pyridine nucleotide contents of islets and on the 915  
insulin released–interactions in vitro with methylene 916  
blue, thiol oxidants, and p-chloromercuribenzoate. 917  
*Diabetes* 28, 593–599. doi:10.2337/diab.28.6.593 918
- Ashcroft, F. M. (2006). K(ATP) channels and 919  
insulin secretion: A key role in health and disease. 920  
*Biochemical Society Transactions* 34, 243–246. doi: 921  
10.1042/BST20060243 922
- Ashcroft, S. J., Capito, K., and Hedekov, C. J. 923  
(1973a). Time course studies of glucose-induced 924

- 925 changes in glucose-6-phosphate and fructose-1,6-  
926 diphosphate content of mouse and rat pancreatic islets.  
927 *Diabetologia* 9, 299–302. doi:10.1007/BF01221858 972
- 928 Ashcroft, S. J. and Christie, M. R. (1979). Effects of  
929 glucose on the cytosolic ration of reduced/oxidized  
930 nicotinamide-adenine dinucleotide phosphate in rat  
931 islets of Langerhans. *The Biochemical Journal* 184,  
932 697–700. doi:10.1042/bj1840697 973
- 933 Ashcroft, S. J., Hedekov, C. J., and Randle, P. J. (1970).  
934 Glucose metabolism in mouse pancreatic islets. *The*  
935 *Biochemical Journal* 118, 143–154. doi:10.1042/  
936 bj1180143 974
- 937 Ashcroft, S. J., Weerasinghe, L. C., and Randle,  
938 P. J. (1973b). Interrelationship of islet metabolism,  
939 adenosine triphosphate content and insulin release.  
940 *The Biochemical Journal* 132, 223–231. doi:10.1042/  
941 bj1320223 975
- 942 Bergmann, F. T. (2023). basico: a simplified python  
943 interface to COPASI doi:10.5281/zenodo.7541481 976
- 944 Bertram, R., Pedersen, M. G., Luciani, D. S., and  
945 Sherman, A. (2006). A simplified model for  
946 mitochondrial ATP production. *Journal of theoretical*  
947 *biology* 243, 575–586 977
- 948 Bertram, R., Sherman, A., and Satin, L. S.  
949 (2007). Metabolic and electrical oscillations:  
950 partners in controlling pulsatile insulin secretion.  
951 *American Journal of Physiology-Endocrinology And*  
952 *Metabolism* 293, E890–E900 978
- 953 Brun, T., Roche, E., Assimakopoulos-Jeannet, F.,  
954 Corkey, B. E., Kim, K. H., and Prentki, M. (1996).  
955 Evidence for an anaplerotic/malonyl-CoA pathway in  
956 pancreatic beta-cell nutrient signaling. *Diabetes* 45,  
957 190–198. doi:10.2337/diab.45.2.190 979
- 958 Corkey, B. E., Glennon, M. C., Chen, K. S., Deeney, J. T.,  
959 Matschinsky, F. M., and Prentki, M. (1989). A role for  
960 malonyl-CoA in glucose-stimulated insulin secretion  
961 from clonal pancreatic beta-cells. *The Journal of*  
962 *Biological Chemistry* 264, 21608–21612 980
- 963 Cote, R., Reisinger, F., Martens, L., Barsnes, H.,  
964 Vizcaino, J. A., and Hermjakob, H. (2010). The  
965 Ontology Lookup Service: Bigger and better. *Nucleic*  
966 *Acids Research* 38, W155–W160. doi:10.1093/nar/  
967 gkq331 981
- 968 Courtot, M., Juty, N., Knüpfer, C., Waltemath, D.,  
969 Zhukova, A., Dräger, A., et al. (2011). Controlled  
vocalaries and semantics in systems biology. 970  
*Molecular Systems Biology* 7, 543. doi:10.1038/msb. 971  
2011.77 972
- Dean, P. M. (1973). Ultrastructural morphometry of the 973  
pancreatic  $\beta$ -cell. *Diabetologia* 9, 115–119. doi:10. 974  
1007/BF01230690 975
- Deepa Maheshvare, M. and König, M. (2023). Model of 976  
glucose-stimulated insulin secretion in the pancreatic 977  
 $\beta$ -Cell doi:10.5281/zenodo.7711084 978
- Detimary, P., Dejonghe, S., Ling, Z., Pipeleers, D., 979  
Schuit, F., and Henquin, J. C. (1998). The changes in 980  
adenine nucleotides measured in glucose-stimulated 981  
rodent islets occur in beta cells but not in alpha 982  
cells and are also observed in human islets. *The* 983  
*Journal of Biological Chemistry* 273, 33905–33908. 984  
doi:10.1074/jbc.273.51.33905 985
- Detimary, P., Van den Berghe, G., and Henquin, J. C. 986  
(1996). Concentration dependence and time course 987  
of the effects of glucose on adenine and guanine 988  
nucleotides in mouse pancreatic islets. *The Journal* 989  
*of Biological Chemistry* 271, 20559–20565. doi:10. 990  
1074/jbc.271.34.20559 991
- Di Camillo, B., Eduati, F., Nair, S. K., Avogaro, A., and 992  
Toffolo, G. M. (2014). Leucine modulates dynamic 993  
phosphorylation events in insulin signaling pathway 994  
and enhances insulin-dependent glycogen synthesis 995  
in human skeletal muscle cells. *BMC cell biology* 15, 996  
9. doi:10.1186/1471-2121-15-9 997
- Ebrahim, A., Beber, M. E., Mandal, S., 998  
König, M., Redestig, H., Diener, C., 999  
et al. (2023). opencobra/cobrapy: 0.26.21000  
doi:10.5281/zenodo.7502407 1001
- Ewart, R. B., Yousufzai, S. Y., Bradford, M. W., and 1002  
Shrago, E. (1983). Rat islet mitochondrial adenine 1003  
nucleotide translocase and the regulation of insulin 1004  
secretion. *Diabetes* 32, 793–797. doi:10.2337/diab 1005  
32.9.793 1006
- Fridlyand, L. E. and Philipson, L. H. (2010). Glucose 1007  
sensing in the pancreatic beta cell: A computational 1008  
systems analysis. *Theoretical Biology and Medical* 1009  
*Modelling* 7, 15. doi:10.1186/1742-4682-7-15 1010
- Fritsche, L., Weigert, C., Häring, H.-U., and 1011  
Lehmann, R. (2008). How insulin receptor substrate 1012  
proteins regulate the metabolic capacity of the 1013  
liver—implications for health and disease. *Current* 1014

- 1015 *Medicinal Chemistry* 15, 1316–1329. doi:10.2174/  
1016 092986708784534956
- 1017 Gelbach, P. E., Zheng, D., Fraser, S. E., White, K. L.,  
1018 Graham, N. A., and Finley, S. D. (2022). Kinetic  
1019 and data-driven modeling of pancreatic  $\beta$ -cell central  
1020 carbon metabolism and insulin secretion. *PLoS*  
1021 *computational biology* 18, e1010555
- 1022 Giroix, M. H., Sener, A., Pipeleers, D. G., and Malaisse,  
1023 W. J. (1984). Hexose metabolism in pancreatic islets.  
1024 Inhibition of hexokinase. *The Biochemical Journal*  
1025 223, 447–453. doi:10.1042/bj2230447
- 1026 Goldberg, R. and Tewari, Y. (2003). *Thermodynamics*  
1027 *of Enzyme-Catalyzed Reactions* (McGraw Hill, New  
1028 York, NY)
- 1029 Grzegorzewski, J., Bartsch, F., Köller, A., and König,  
1030 M. (2021a). Pharmacokinetics of Caffeine: A  
1031 Systematic Analysis of Reported Data for Application  
1032 in Metabolic Phenotyping and Liver Function Testing.  
1033 *Frontiers in Pharmacology* 12, 752826. doi:10.3389/  
1034 fphar.2021.752826
- 1035 Grzegorzewski, J., Brandhorst, J., Green, K.,  
1036 Eleftheriadou, D., Dupont, Y., Barthorscht, F., et al.  
1037 (2021b). PK-DB: Pharmacokinetics database for  
1038 individualized and stratified computational modeling.  
1039 *Nucleic Acids Research* 49, D1358–D1364. doi:10.  
1040 1093/nar/gkaa990
- 1041 Guay, C., Joly, E., Pepin, E., Barbeau, A., Hentsch,  
1042 L., Pineda, M., et al. (2013). A role for cytosolic  
1043 isocitrate dehydrogenase as a negative regulator of  
1044 glucose signaling for insulin secretion in pancreatic  
1045  $\beta$ -cell. *PLoS One* 8, e77097. doi:10.1371/journal.  
1046 pone.0077097
- 1047 Guerrero-Hernandez, A. and Verkhatsky, A. (2014).  
1048 Calcium signalling in diabetes. *Cell Calcium* 56, 297–  
1049 301. doi:10.1016/j.ceca.2014.08.009
- 1050 Hari, A. and Lobo, D. (2022). mergem: merging  
1051 and comparing genome-scale metabolic models using  
1052 universal identifiers. *bioRxiv*
- 1053 Hedeskov, C. J., Capito, K., and Thams, P. (1987).  
1054 Cytosolic ratios of free [NADPH]/[NADP<sup>+</sup>] and  
1055 [NADH]/[NAD<sup>+</sup>] in mouse pancreatic islets, and  
1056 nutrient-induced insulin secretion. *The Biochemical*  
1057 *Journal* 241, 161–167. doi:10.1042/bj2410161
- Hoops, S., Sahle, S., Gauges, R., Lee, C., Pahle, J.,  
1058 Simus, N., et al. (2006). COPASI—a complex  
1059 pathway simulator. *Bioinformatics* 22, 3067–3074  
1060 1060
- Huang, M. and Joseph, J. W. (2014). Assessment  
1061 of the metabolic pathways associated with glucose-  
1062 stimulated biphasic insulin secretion. *Endocrinology*  
1063 155, 1653–1666. doi:10.1210/en.2013-1805  
1064 1064
- Hucka, M., Bergmann, F. T., Chaouiya, C., Dräger,  
1065 A., Hoops, S., Keating, S. M., et al. (2019).  
1066 The Systems Biology Markup Language (SBML):  
1067 Language Specification for Level 3 Version 2 Core  
1068 Release 2. *Journal of Integrative Bioinformatics* 16,  
1069 20190021. doi:10.1515/jib-2019-0021  
1070 1070
- Hucka, M., Nickerson, D. P., Bader, G. D., Bergmann,  
1071 F. T., Cooper, J., Demir, E., et al. (2015). Promoting  
1072 Coordinated Development of Community-Based  
1073 Information Standards for Modeling in Biology: The  
1074 COMBINE Initiative. *Frontiers in Bioengineering*  
1075 *and Biotechnology* 3, 19. doi:10.3389/fbioe.2015.  
1076 00019  
1077 1077
- Jiang, N., Cox, R. D., and Hancock, J. M. (2007).  
1078 A kinetic core model of the glucose-stimulated  
1079 insulin secretion network of pancreatic  $\beta$  cells.  
1080 *Mammalian Genome* 18, 508–520. doi:10.1007/  
1081 s00335-007-9011-y  
1082 1082
- Johnson, D., Shepherd, R. M., Gill, D., Gorman, T.,  
1083 Smith, D. M., and Dunne, M. J. (2007). Glucose-  
1084 dependent modulation of insulin secretion and  
1085 intracellular calcium ions by GKA50, a glucokinase  
1086 activator. *Diabetes* 56, 1694–1702. doi:10.2337/  
1087 db07-0026  
1088 1088
- Keating, S. M., Waltemath, D., König, M., Zhang, F.,  
1089 Dräger, A., Chaouiya, C., et al. (2020). SBML Level  
1090 3: An extensible format for the exchange and reuse  
1091 of biological models. *Molecular Systems Biology* 16,  
1092 e9110. doi:10.15252/msb.20199110  
1093 1093
- Kent, E., Hoops, S., and Mendes, P. (2012).  
1094 Condor-COPASI: High-throughput computing for  
1095 biochemical networks. *BMC systems biology* 6, 91.  
1096 doi:10.1186/1752-0509-6-91  
1097 1097
- King, Z. A., Lu, J., Dräger, A., Miller, P., Federowicz,  
1098 S., Lerman, J. A., et al. (2016). BiGG Models: A  
1099 platform for integrating, standardizing and sharing  
1100 genome-scale models. *Nucleic Acids Research* 44,  
1101 D515–522. doi:10.1093/nar/gkv1049  
1102 1102



- 1103 König, M., Bulik, S., and Holzhütter, H.-G. (2012a).  
1104 Quantifying the contribution of the liver to glucose  
1105 homeostasis: A detailed kinetic model of human  
1106 hepatic glucose metabolism. *PLoS computational*  
1107 *biology* 8, e1002577. doi:10.1371/journal.pcbi.  
1108 1002577
- 1109 König, M., Dräger, A., and Holzhütter, H.-G.  
1110 (2012b). Cysbml: a cytoscape plugin for SBML.  
1111 *Bioinformatics* 28, 2402–2403
- 1112 König, M. (2021). sbmlsim: SBML simulation made  
1113 easy doi:10.5281/zenodo.5531088
- 1114 König, M. (2022a). brendapy: BRENDA parser in  
1115 python doi:10.5281/zenodo.6555202
- 1116 König, M. (2022b). pymetadata: Python utilities for  
1117 SBML doi:10.5281/zenodo.7432576
- 1118 König, M. (2022c). sbmlutils: Python utilities for SBML  
1119 doi:10.5281/zenodo.7462781
- 1120 Lamontagne, J., Pepin, E., Peyot, M.-L., Joly, E.,  
1121 Ruderman, N. B., Poitout, V., et al. (2009).  
1122 Pioglitazone acutely reduces insulin secretion and  
1123 causes metabolic deceleration of the pancreatic  
1124 beta-cell at submaximal glucose concentrations.  
1125 *Endocrinology* 150, 3465–3474. doi:10.1210/en.  
1126 2008-1557
- 1127 Liebermeister, W., Uhlendorf, J., and Klipp, E.  
1128 (2010). Modular rate laws for enzymatic reactions:  
1129 Thermodynamics, elasticities and implementation.  
1130 *Bioinformatics (Oxford, England)* 26, 1528–1534.  
1131 doi:10.1093/bioinformatics/btq141
- 1132 Liu, Y. Q., Moibi, J. A., and Leahy, J. L. (2004). Chronic  
1133 high glucose lowers pyruvate dehydrogenase activity  
1134 in islets through enhanced production of long chain  
1135 acyl-CoA: Prevention of impaired glucose oxidation  
1136 by enhanced pyruvate recycling through the malate-  
1137 pyruvate shuttle. *The Journal of Biological Chemistry*  
1138 279, 7470–7475. doi:10.1074/jbc.M307921200
- 1139 Liu, Y. Q., Tornheim, K., and Leahy, J. L. (1998). Fatty  
1140 acid-induced beta cell hypersensitivity to glucose.  
1141 Increased phosphofructokinase activity and lowered  
1142 glucose-6-phosphate content. *Journal of Clinical*  
1143 *Investigation* 101, 1870–1875. doi:10.1172/JCI1211
- 1144 MacDonald, P. E., Joseph, J. W., and Rorsman, P.  
1145 (2005). Glucose-sensing mechanisms in pancreatic  
1146 beta-cells. *Philosophical Transactions of the Royal*  
*Society of London. Series B, Biological Sciences* 360,1147  
2211–2225. doi:10.1098/rstb.2005.1762 1148
- Malaisse, W. J., Hutton, J. C., Kawazu, S., and Sener,1149  
A. (1978). The stimulus-secretion coupling of1150  
glucose-induced insulin release. Metabolic effects of1151  
menadione in isolated islets. *European Journal of*1152  
*Biochemistry* 87, 121–130. doi:10.1111/j.1432-1033.1153  
1978.tb12357.x 1154
- Malaisse, W. J. and Sener, A. (1987). Glucose-induced1155  
changes in cytosolic ATP content in pancreatic islets.1156  
*Biochimica Et Biophysica Acta* 927, 190–195. doi:10.1157  
1016/0167-4889(87)90134-0 1158
- Malinowski, R. M., Ghiasi, S. M., Mandrup-Poulsen,1159  
T., Meier, S., Lerche, M. H., Ardenkjær-Larsen,1160  
J. H., et al. (2020). Pancreatic  $\beta$ -cells respond1161  
to fuel pressure with an early metabolic switch.1162  
*Scientific Reports* 10, 15413. doi:10.1038/1163  
s41598-020-72348-1 1164
- Malmgren, S., Spégel, P., Danielsson, A. P. H., Nagorny,1165  
C. L., Andersson, L. E., Nitert, M. D., et al.1166  
(2013). Coordinate changes in histone modifications,1167  
mRNA levels, and metabolite profiles in clonal INS-1168  
832/13  $\beta$ -cells accompany functional adaptations to1169  
lipotoxicity. *The Journal of Biological Chemistry* 288,1170  
11973–11987. doi:10.1074/jbc.M112.422527 1171
- Matschinsky, F. M. and Ellerman, J. E. (1968).1172  
Metabolism of glucose in the islets of Langerhans.1173  
*The Journal of Biological Chemistry* 243, 2730–2736 1174
- Matschinsky, F. M., Pagliara, A. S., Stillings, S. N.,1175  
and Hover, B. A. (1976). Glucose and ATP levels1176  
in pancreatic islet tissue of normal and diabetic rats.1177  
*The Journal of Clinical Investigation* 58, 1193–1200.1178  
doi:10.1172/JCI108572 1179
- McKenna, J. P., Dhumpa, R., Mukhitov, N., Roper,1180  
M. G., and Bertram, R. (2016). Glucose Oscillations1181  
Can Activate an Endogenous Oscillator in Pancreatic1182  
Islets. *PLOS Computational Biology* 12, e1005143.1183  
doi:10.1371/journal.pcbi.1005143 1184
- Meglason, M. D. and Matschinsky, F. M. (1986).1185  
Pancreatic islet glucose metabolism and regulation1186  
of insulin secretion. *Diabetes/Metabolism Reviews* 2,1187  
163–214. doi:10.1002/dmr.5610020301 1188
- Meglason, M. D., Nelson, J., Nelson, D., and Erecinska,1189  
M. (1989). Bioenergetic response of pancreatic1190  
islets to stimulation by fuel molecules. *Metabolism:*1191



- 1192 *Clinical and Experimental* 38, 1188–1195. doi:10.  
1193 1016/0026-0495(89)90158-3
- 1194 Merrins, M. J., Bertram, R., Sherman, A., and Satin,  
1195 L. S. (2012). Phosphofructo-2-kinase/Fructose-2,6-  
1196 bisphosphatase Modulates Oscillations of Pancreatic  
1197 Islet Metabolism. *PLoS ONE* 7, e34036. doi:10.1371/  
1198 journal.pone.0034036
- 1199 Miwa, I., Ichimura, N., Sugiura, M., Hamada, Y., and  
1200 Taniguchi, S. (2000). Inhibition of glucose-induced  
1201 insulin secretion by 4-hydroxy-2-nonenal and other  
1202 lipid peroxidation products. *Endocrinology* 141, 2767–  
1203 2772. doi:10.1210/endo.141.8.7614
- 1204 Neal, M. L., Gennari, J. H., Waltemath, D., Nickerson,  
1205 D. P., and König, M. (2020). Open modeling and  
1206 exchange (OMEX) metadata specification version 1.0.  
1207 *Journal of Integrative Bioinformatics* 17, 20200020.  
1208 doi:10.1515/jib-2020-0020
- 1209 Neal, M. L., König, M., Nickerson, D., Mısırlı, G.,  
1210 Kalbasi, R., Dräger, A., et al. (2019). Harmonizing  
1211 semantic annotations for computational models in  
1212 biology. *Briefings in Bioinformatics* 20, 540–550.  
1213 doi:10.1093/bib/bby087
- 1214 Newsholme, P., Cruzat, V., Arfuso, F., and Keane, K.  
1215 (2014). Nutrient regulation of insulin secretion and  
1216 action. *Journal of Endocrinology* 221, R105–R120.  
1217 doi:10.1530/JOE-13-0616
- 1218 Noor, E., Haraldsdóttir, H. S., Milo, R., and Fleming,  
1219 R. M. T. (2013). Consistent Estimation of Gibbs  
1220 Energy Using Component Contributions. *PLoS*  
1221 *Computational Biology* 9, e1003098. doi:10.1371/  
1222 journal.pcbi.1003098
- 1223 Noronha, A., Modamio, J., Jarosz, Y., Guerard, E.,  
1224 Sompairac, N., Preciat, G., et al. (2019). The Virtual  
1225 Metabolic Human database: Integrating human and  
1226 gut microbiome metabolism with nutrition and disease.  
1227 *Nucleic Acids Research* 47, D614–D624. doi:10.1093/  
1228 nar/gky992
- 1229 Pedersen, M. G., Corradin, A., Toffolo, G. M., and  
1230 Cobelli, C. (2008). A subcellular model of glucose-  
1231 stimulated pancreatic insulin secretion. *Philosophical*  
1232 *Transactions. Series A, Mathematical, Physical, and*  
1233 *Engineering Sciences* 366, 3525–3543. doi:10.1098/  
1234 rsta.2008.0120
- 1235 Placzek, S., Schomburg, I., Chang, A., Jeske, L., Ulbrich,  
1236 M., Tillack, J., et al. (2017). BRENDA in 2017: New  
perspectives and new tools in BRENDA. *Nucleic*  
*Acids Research* 45, D380–D388. doi:10.1093/nar/1238  
gkw952 1239
- Prentki, M., Matschinsky, F. M., and Madiraju, S. M.  
(2013). Metabolic Signaling in Fuel-Induced Insulin  
Secretion. *Cell Metabolism* 18, 162–185. doi:10.1242  
1016/j.cmet.2013.05.018 1243
- Rohatgi, A. (2021). Webplotdigitizer: Version 4.5 1244
- Rorsman, P. and Braun, M. (2013). Regulation of  
insulin secretion in human pancreatic islets. *Annual*  
*Review of Physiology* 75, 155–179. doi:10.1146/1247  
annurev-physiol-030212-183754 1248
- Salvucci, M., Neufeld, Z., and Newsholme, P.  
(2013). Mathematical Model of Metabolism and  
Electrophysiology of Amino Acid and Glucose  
Stimulated Insulin Secretion: In Vitro Validation  
Using a  $\beta$ -Cell Line. *PLoS ONE* 8, e52611. doi:10.1253  
1371/journal.pone.0052611 1254
- Sauro, H. M. (2020). *Systems Biology: Introduction to*  
*Pathway Modeling* (Ambrosius Publishing) 1256
- Sener, A., Hutton, J. C., Kawazu, S., Boschero, A. C.,  
Somers, G., Devis, G., et al. (1978). The stimulus-  
secretion coupling of glucose-induced insulin release.  
Metabolic and functional effects of  $\text{NH}_4^+$  in rat islets.  
*The Journal of Clinical Investigation* 62, 868–878.  
doi:10.1172/JCI109199 1262
- Sener, A., Van Schaftingen, E., Van de Winkel, M.,  
Pipeleers, D. G., Malaisse-Lagae, F., Malaisse, W. J.,  
et al. (1984). Effects of glucose and glucagon on the  
fructose 2,6-bisphosphate content of pancreatic islets  
and purified pancreatic B-cells. A comparison with  
isolated hepatocytes. *The Biochemical Journal* 221,  
759–764. doi:10.1042/bj2210759 1269
- Smolen, P. (1995). A model for glycolytic oscillations  
based on skeletal muscle phosphofructokinase  
kinetics. *Journal of Theoretical Biology* 174, 137–148.  
doi:10.1006/jtbi.1995.0087 1273
- Somogyi, E. T., Bouteiller, J.-M., Glazier, J. A.,  
König, M., Medley, J. K., Swat, M. H., et al.  
(2015). libRoadRunner: A high performance SBML  
simulation and analysis library. *Bioinformatics*  
(Oxford, England) 31, 3315–3321. doi:10.1093/1278  
bioinformatics/btv363 1279
- Spégel, P., Andersson, L. E., Storm, P., Sharoyko, V.,  
Göhring, I., Rosengren, A. H., et al. (2015). Unique

- 1282 and Shared Metabolic Regulation in Clonal  $\beta$ -Cells  
1283 and Primary Islets Derived From Rat Revealed by  
1284 Metabolomics Analysis. *Endocrinology* 156, 1995–  
1285 2005. doi:10.1210/en.2014-1391
- 1286 Spégel, P., Sharoyko, V. V., Goehring, I., Danielsson,  
1287 A. P. H., Malmgren, S., Nagorny, C. L. F., et al.  
1288 (2013). Time-resolved metabolomics analysis of  $\beta$ -  
1289 cells implicates the pentose phosphate pathway in the  
1290 control of insulin release. *The Biochemical Journal*  
1291 450, 595–605. doi:10.1042/BJ20121349
- 1292 Sugden, M. C. and Ashcroft, S. J. (1977).  
1293 Phosphoenolpyruvate in rat pancreatic islets:  
1294 A possible intracellular trigger of insulin release?  
1295 *Diabetologia* 13, 481–486. doi:10.1007/BF01234500
- 1296 Taniguchi, S., Okinaka, M., Tanigawa, K., and  
1297 Miwa, I. (2000). Difference in mechanism  
1298 between glyceraldehyde- and glucose-induced insulin  
1299 secretion from isolated rat pancreatic islets. *Journal*  
1300 *of Biochemistry* 127, 289–295. doi:10.1093/  
1301 oxfordjournals.jbchem.a022606
- 1302 The UniProt Consortium (2017). UniProt: The universal  
1303 protein knowledgebase. *Nucleic Acids Research* 45,  
1304 D158–D169. doi:10.1093/nar/gkw1099
- 1305 Tornheim, K. (1997). Are metabolic oscillations  
1306 responsible for normal oscillatory insulin secretion?  
1307 *Diabetes* 46, 1375–1380
- 1308 Trus, M., Warner, H., and Matschinsky, F. (1980).  
1309 Effects of glucose on insulin release and on  
1310 intermediary metabolism of isolated perfused  
1311 pancreatic islets from fed and fasted rats. *Diabetes* 29,  
1312 1–14. doi:10.2337/diab.29.1.1
- 1313 Trus, M. D., Hintz, C. S., Weinstein, J. B., Williams,  
1314 A. D., Pagliara, A. S., and Matschinsky, F. M.  
1315 (1979). A comparison of the effects of glucose  
1316 and acetylcholine on insulin release and intermediary  
1317 metabolism in rat pancreatic islets. *The Journal of*  
1318 *Biological Chemistry* 254, 3921–3929
- 1319 Welsh, C., Xu, J., Smith, L., König, M., Choi, K., and  
1320 Sauro, H. M. (2023). libRoadRunner 2.0: A high  
1321 performance SBML simulation and analysis library.  
1322 *Bioinformatics (Oxford, England)* 39, btac770. doi:10.  
1323 1093/bioinformatics/btac770
- 1324 Westermark, P. O., Kotaleski, J. H., Björklund, A.,  
1325 Grill, V., and Lansner, A. (2007). A mathematical  
1326 model of the mitochondrial NADH shuttles and  
anaplerosis in the pancreatic beta-cell. *American* 1327  
*journal of physiology. Endocrinology and metabolism* 1328  
292, E373–93. doi:10.1152/ajpendo.00589.2005 1329
- Wittig, U., Rey, M., Weidemann, A., Kania, R., and 1330  
Müller, W. (2018). SABIO-RK: An updated resource 1331  
for manually curated biochemical reaction kinetics. 1332  
*Nucleic Acids Research* 46, D656–D660. doi:10.1093/1333  
nar/gkx1065 1334
- Woods, S. C., Lutz, T. A., Geary, N., and Langhans, 1335  
W. (2006). Pancreatic signals controlling food 1336  
intake; insulin, glucagon and amylin. *Philosophical* 1337  
*Transactions of the Royal Society of London. Series* 1338  
*B, Biological Sciences* 361, 1219–1235. doi:10.1098/1339  
rstb.2006.1858 1340
- Xu, J., Han, J., Long, Y. S., Epstein, P. N., and Liu, 1341  
Y. Q. (2008a). The role of pyruvate carboxylase in 1342  
insulin secretion and proliferation in rat pancreatic 1343  
beta cells. *Diabetologia* 51, 2022–2030. doi:10.1007/1344  
s00125-008-1130-9 1345
- Xu, J., Han, J., Long, Y. S., Lock, J., Weir, G. C., Epstein, 1346  
P. N., et al. (2008b). Malic enzyme is present in mouse 1347  
islets and modulates insulin secretion. *Diabetologia* 1348  
51, 2281–2289. doi:10.1007/s00125-008-1155-0 1349

**Table 1.** Overview of studies reporting concentrations of metabolites used for model calibration.

| Study           | PMID     | Metabolites                                               | Species                                                          | Measurement | Steady-state | Time course | Citation                        |
|-----------------|----------|-----------------------------------------------------------|------------------------------------------------------------------|-------------|--------------|-------------|---------------------------------|
| Akhtar1977      | 19330    | G6P                                                       | Wistar rats                                                      | Absolute    | ✓            |             | Akhtar et al. (1977)            |
| Alcazar2019     | 31632354 | IRS                                                       | Human, C57BL6/J mice                                             | Absolute    | ✓            | ✓           | Alcazar and Buchwald (2019)     |
| Ammon1979       | 36318    | NAD, NADH/NAD, NADH+NAD, NADH                             | Wistar rats                                                      | Absolute    | ✓            | ✓           | Ammon et al. (1979)             |
| Ammon1998       | 9582515  | NAD, ATP/ADP, NADH, NADH+NAD, IRS, NADH/NAD               | Wistar rats                                                      | Absolute    | ✓            |             | Ammon et al. (1998)             |
| Ashcroft1970    | 4919469  | G6P                                                       | Albino mice                                                      | Absolute    | ✓            |             | Ashcroft et al. (1970)          |
| Ashcroft1973    | 4148924  | ATP, IRS                                                  | White mice                                                       | Absolute    | ✓            | ✓           | Ashcroft et al. (1973a)         |
| Ashcroft1973b   | 4199014  | G6P                                                       | Theillers original strain mice, Wistar rats                      | Absolute    | ✓            | ✓           | Ashcroft et al. (1973b)         |
| Ashcroft1979    | 44196    | PYR                                                       | Wistar rats                                                      | Absolute    | ✓            |             | Ashcroft and Christie (1979)    |
| Brun1996        | 8549864  | IRS                                                       | HIT-T15 $\beta$ -cell line                                       | Absolute    | ✓            | ✓           | Brun et al. (1996)              |
| Corkey1989      | 2689441  | IRS                                                       | HIT $\beta$ -cell line                                           | Absolute    | ✓            |             | Corkey et al. (1989)            |
| Detimary1996    | 8702800  | ATP, ADP, ATP+ADP, ATP/ADP, IRS                           | NMRI mice                                                        | Absolute    | ✓            | ✓           | Detimary et al. (1996)          |
| Detimary1998    | 9852040  | ATP, ADP, ATP+ADP, ATP/ADP                                | Wistar rats                                                      | Absolute    | ✓            |             | Detimary et al. (1998)          |
| Ewart1983       | 6313455  | PEP, IRS                                                  | Sprague-Dawley rats                                              | Absolute    | ✓            |             | Ewart et al. (1983)             |
| Giroix1984      | 6388570  | PEP, IRS                                                  | Albino rats                                                      | Absolute    | ✓            |             | Giroix et al. (1984)            |
| Guay2013        | 24130841 | DHAP, ATP, PYR, LAC, NADH/NAD, IRS                        | INS 832/13 $\beta$ -cell line                                    | Relative    | ✓            |             | Guay et al. (2013)              |
| Hedeskov1987    | 3551925  | PYR, LAC, NADH/NAD, IRS                                   | Theillers original strain mice                                   | Absolute    | ✓            |             | Hedeskov et al. (1987)          |
| Huang2014       | 24564396 | G6P, DHAP, PG3, PYR, LAC                                  | INS 832/13 $\beta$ -cell line                                    | Absolute    | ✓            | ✓           | Huang and Joseph (2014)         |
| Johnson2007     | 17360975 | IRS                                                       | Human, Sprague-Dawley rats, C57BL6 mice, MIN6 $\beta$ -cell line | Absolute    | ✓            |             | Johnson et al. (2007)           |
| Lamontagne2009  | 19406947 | APT, IRS                                                  | INS 832/13 $\beta$ -cell line                                    | Relative    | ✓            |             | Lamontagne et al. (2009)        |
| Liu1998         | 9576750  | G6P, IRS                                                  | Sprague-Dawley rats                                              | Absolute    | ✓            |             | Liu et al. (1998)               |
| Liu2004         | 14660628 | G6P, PYR, IRS                                             | Sprague-Dawley rats                                              | Absolute    | ✓            |             | Liu et al. (2004)               |
| Malaisse1977    | 27353    | ATP, ADP, ATP+ADP, ATP/ADP, NAD, NADH, NADH+NAD, NADH/NAD | Albino rats                                                      | Absolute    | ✓            |             | Malaisse et al. (1978)          |
| Malaisse1987    | 2434137  | ATP, ADP, ATP+ADP, ATP/ADP                                | Albino rats                                                      | Absolute    | ✓            |             | Malaisse and Sener (1987)       |
| Malinowski2020  | 32963286 | PYR, LAC                                                  | INS-1 $\beta$ -cell line                                         | Relative    | ✓            |             | Malinowski et al. (2020)        |
| Malmgren2013    | 23476019 | GLC, G6P, DHAP, PG3, PYR, LAC                             | INS-1 832/13 $\beta$ -cell line                                  | Relative    | ✓            |             | Malmgren et al. (2013)          |
| Matschinsky1961 | 4870741  | GLC, G6P, FBP, ATP                                        | Mice                                                             | Absolute    | ✓            |             | Matschinsky and Ellerman (1968) |
| Matschinsky1976 | 136453   | GLC, ATP                                                  | Sprague-Dawley rats                                              | Absolute    | ✓            |             | Matschinsky et al. (1976)       |
| Meglason1986    | 2943567  | F26P                                                      | Rats                                                             | Absolute    | ✓            |             | Meglason and Matschinsky (1986) |
| Miwa2000        | 10919261 | G6P, F6P, FBP, GRAP, DHAP                                 | Wistar rats                                                      | Absolute    | ✓            |             | Meglason et al. (1989)          |
| Sener1978       | 29912    | NAD, NADH, NADH+NAD                                       | Albino rats                                                      | Absolute    | ✓            |             | Sener et al. (1978)             |
| Sener1984       | 6383351  | F26BP                                                     | Albino rats                                                      | Absolute    | ✓            | ✓           | Sener et al. (1984)             |
| Spegel2013      | 23282133 | PG2, PG3, PEP, PYR, LAC                                   | INS-1 832/13 $\beta$ -cell line                                  | Relative    | ✓            | ✓           | Spégel et al. (2013)            |
| Spegel2015      | 25774549 | G6P, ATP, PG2, PG3, PEP, PYR, LAC, IRS                    | INS-1 832/13 $\beta$ -cell line                                  | Relative    | ✓            | ✓           | Spégel et al. (2015)            |
| Sugden1977      | 332570   | PEP                                                       | Albino Wistar rats                                               | Absolute    | ✓            |             | Sugden and Ashcroft (1977)      |
| Taniguchi2000   | 10731696 | G6P, F6P, FBP, GRAP, DHAP, ATP                            | Wistar rats                                                      | Absolute    | ✓            | ✓           | Taniguchi et al. (2000)         |
| Trus1979        | 220227   | G6P, NADH, PHOS, IRS                                      | Rats                                                             | Absolute    | ✓            | ✓           | Trus et al. (1979)              |
| Trus1980        | 6991311  | G6P, ATP, ADP, ATP+ADP, NADH, PHOS, IRS                   | Holtzman rats                                                    | Absolute    | ✓            | ✓           | Trus et al. (1980)              |
| Xu2008a         | 18769905 | IRS                                                       | Sprague-Dawley rats                                              | Absolute    | ✓            |             | Xu et al. (2008a)               |
| Xu2008b         | 18802677 | IRS                                                       | C57BL/6 mice, Sprague-Dawley rats, MIN-6 $\beta$ -cell line      | Absolute    | ✓            |             | Xu et al. (2008b)               |

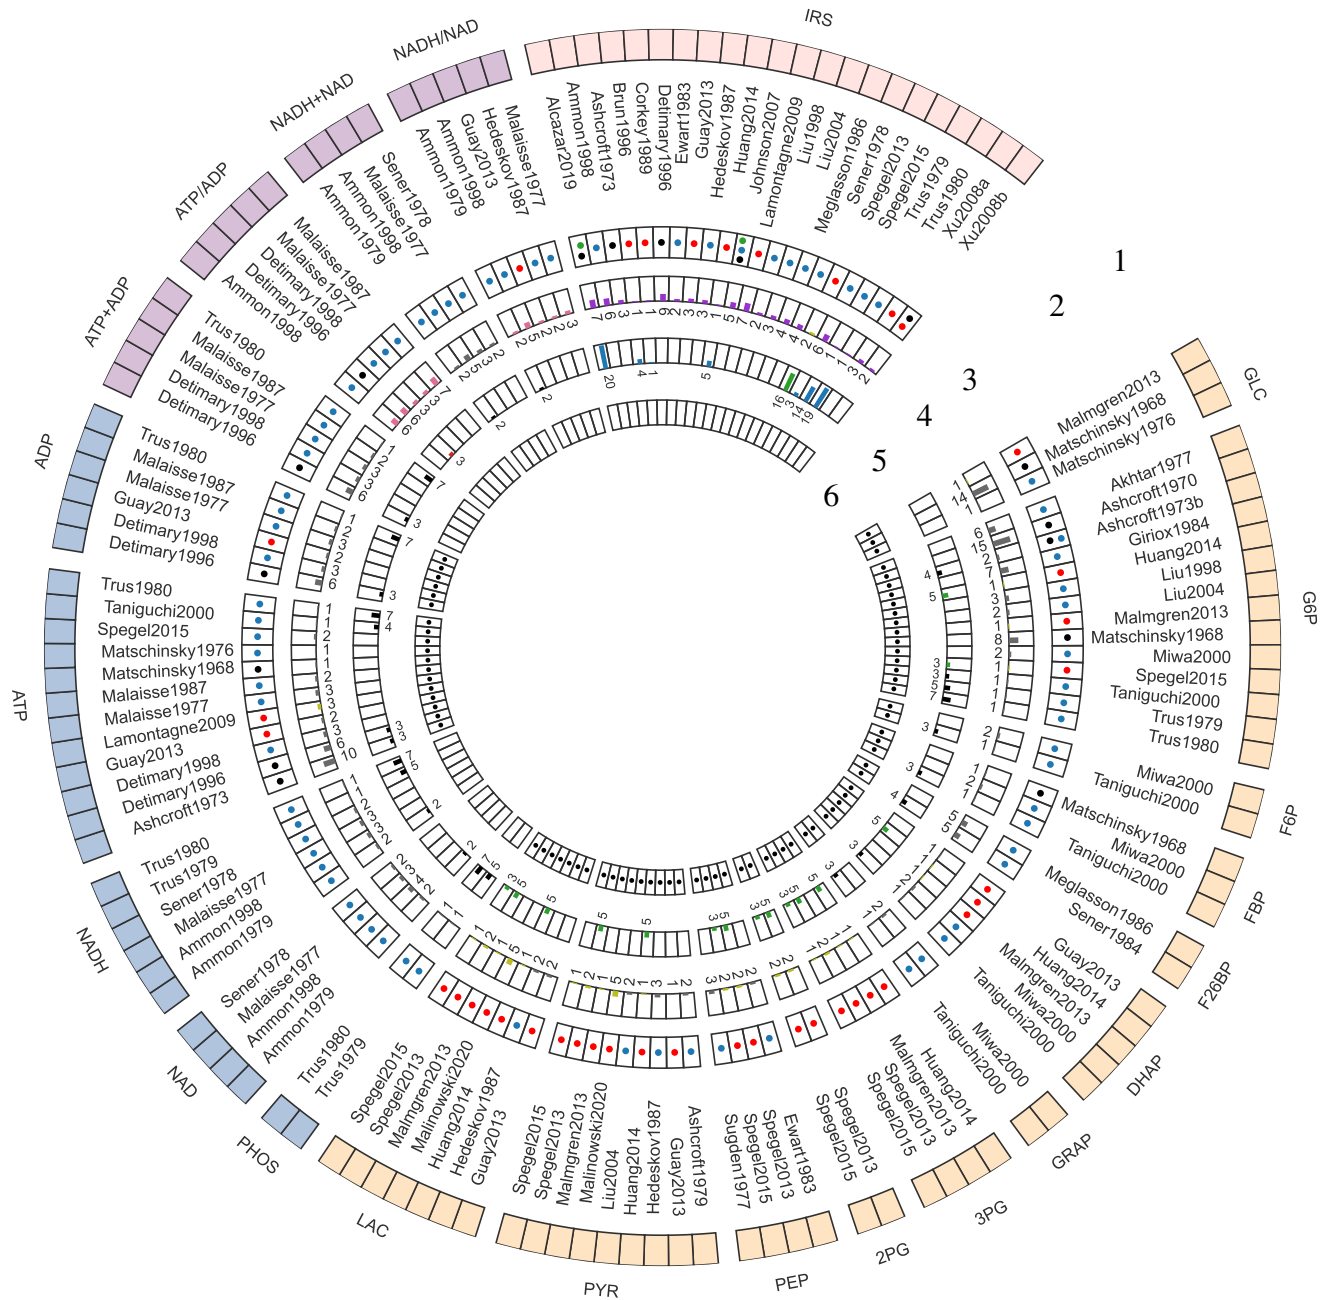

**Figure 1. Curated data for model development and evaluation.** The data description is detailed from the periphery to the center of the Circos plot. *1. Model elements:* The outermost layer provides an overview of the metabolites included in the data set. GLC: glucose, G6P: glucose 6-phosphate, F6P: fructose 6-phosphate, FBP: fructose 1,6-bisphosphate, F26BP: fructose 2,6-bisphosphate, DHAP: dihydroxyacetone phosphate, GRAP: glyceraldehyde 3-phosphate, BPG: 1,3-bisphosphoglycerate, 3PG: 3-phosphoglycerate, 2PG: 2-phosphoglycerate, PEP: phosphoenolpyruvate, PYR: pyruvate, LAC: lactate, PHOS: phosphate, NAD: nicotinamide adenine dinucleotide, NADH: reduced nicotinamide adenine dinucleotide, NADH total: NADH + NAD; NADH ratio: NADH/NAD; ATP: adenosine triphosphate, ADP: adenosine diphosphate, ATP total: ATP + ADP, ATP ratio: ATP/ADP, IRS: insulin secretion rate. The metabolites were grouped in the following categories: Color code: ● glycolytic intermediates, ● cofactors, ● cofactor ratio or sum, ● insulin secretion rate (IRS); *2. Studies:* The second layer depicts the islet-cell specific metabolite profiling studies curated from the literature; *3. Animal species:* The third layer indicates the animal species or cell line from which the data was curated. Color code: ● Rat, ● Human, ● Mouse, and ● Cell line data; *4. time course data:* The fourth layer shows a bar graph illustrating the number of data points collected from studies reporting time course data of metabolites. Color code: ● relative (or fold), ● concentration, ● ratio, ● rate measurements; *5. Steady-state data:* The fifth layer indicates the number of data points collected from studies reporting steady-state/ dose-response data of metabolites. Color code: ● relative (or fold), ● concentration, ● ratio, ● rate measurements; *6. Data used for parameter estimation:* The innermost layer indicates the subset of data used for parameter fitting.



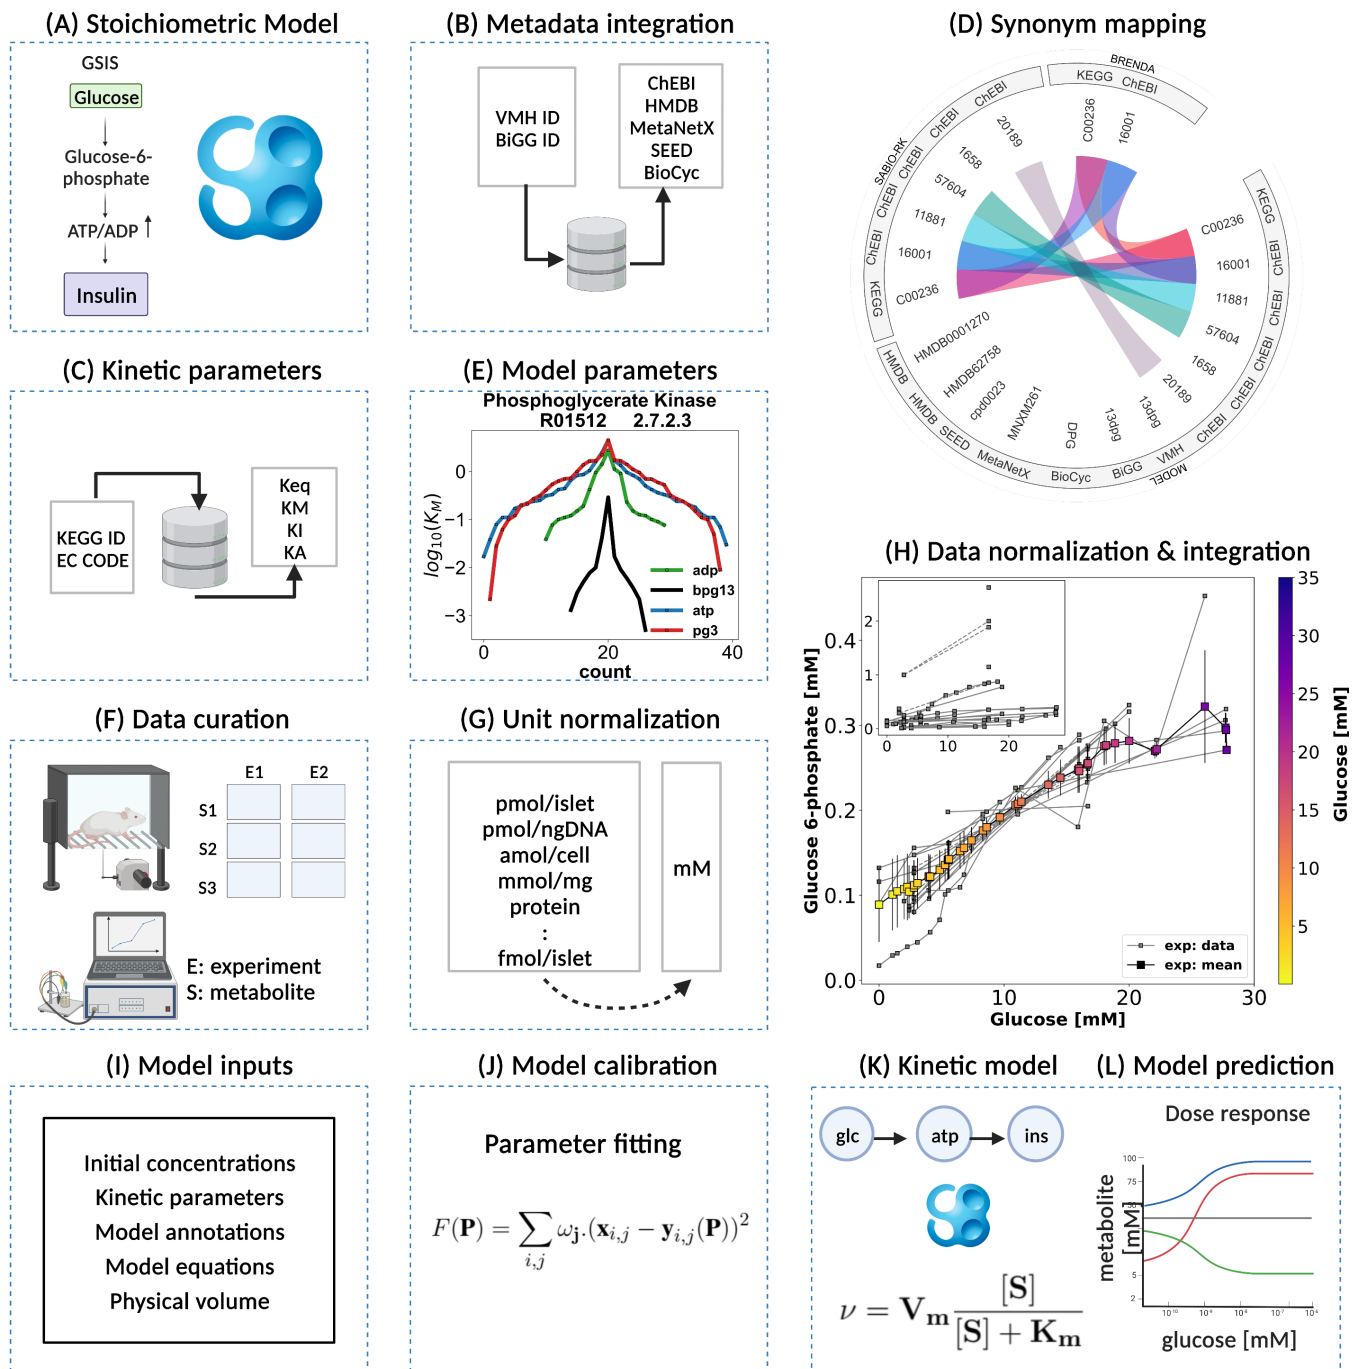

**Figure 2. Kinetic model development workflow.** (A) *Initial stoichiometric model in SBML.* Glycolytic reactions were collected from VMH database and existing models of glycolysis. (B) *Metadata integration.* VMH and BiGG database field identifiers were used to retrieve additional metadata such as HMDB, BioCyc, MetaNetX, ChEBI, and SEED database field identifiers. (C) *Synonym mapping.* The synonyms associated with each metabolite were queried using compound identifier mapping services. (D) *Kinetic parameters.* EC number and KEGG reaction identifiers were used to query half-saturation/Michaelis-Menten  $K_M$ , inhibition  $K_I$ , activation  $K_A$ , and equilibrium  $K_{eq}$  constants (synonym mapping was applied for all compounds). (E) *Model parameters.* The parameter values retrieved from different databases were merged and median values were assigned to the model parameters; (F) *Data curation.* A systematic literature search was performed and metabolite concentrations from islet cell studies were curated. (G) *Unit normalization.* Absolute and relative quantification of metabolite concentrations reported in heterogeneous units were converted to mM. (H) *Data normalization.* Systematic bias observed in the unit-normalized data was removed by performing least-squares minimization to minimize the distance between the mean curve of the unit-normalized data curves and the experimental curves of the unit-normalized data. (I) *Model inputs.* Values of kinetic parameters, initial concentrations, volumes, equations, and annotations have been assigned to the model entities. (J) *Model calibration.* Time course and steady-state data were used for parameter estimation. (K) *Kinetic SBML model.* The final kinetic SBML model was generated. (L) *Model prediction.* Glycolytic intermediates and insulin response were predicted as a function of varying glucose concentrations. Created with BioRender.com.

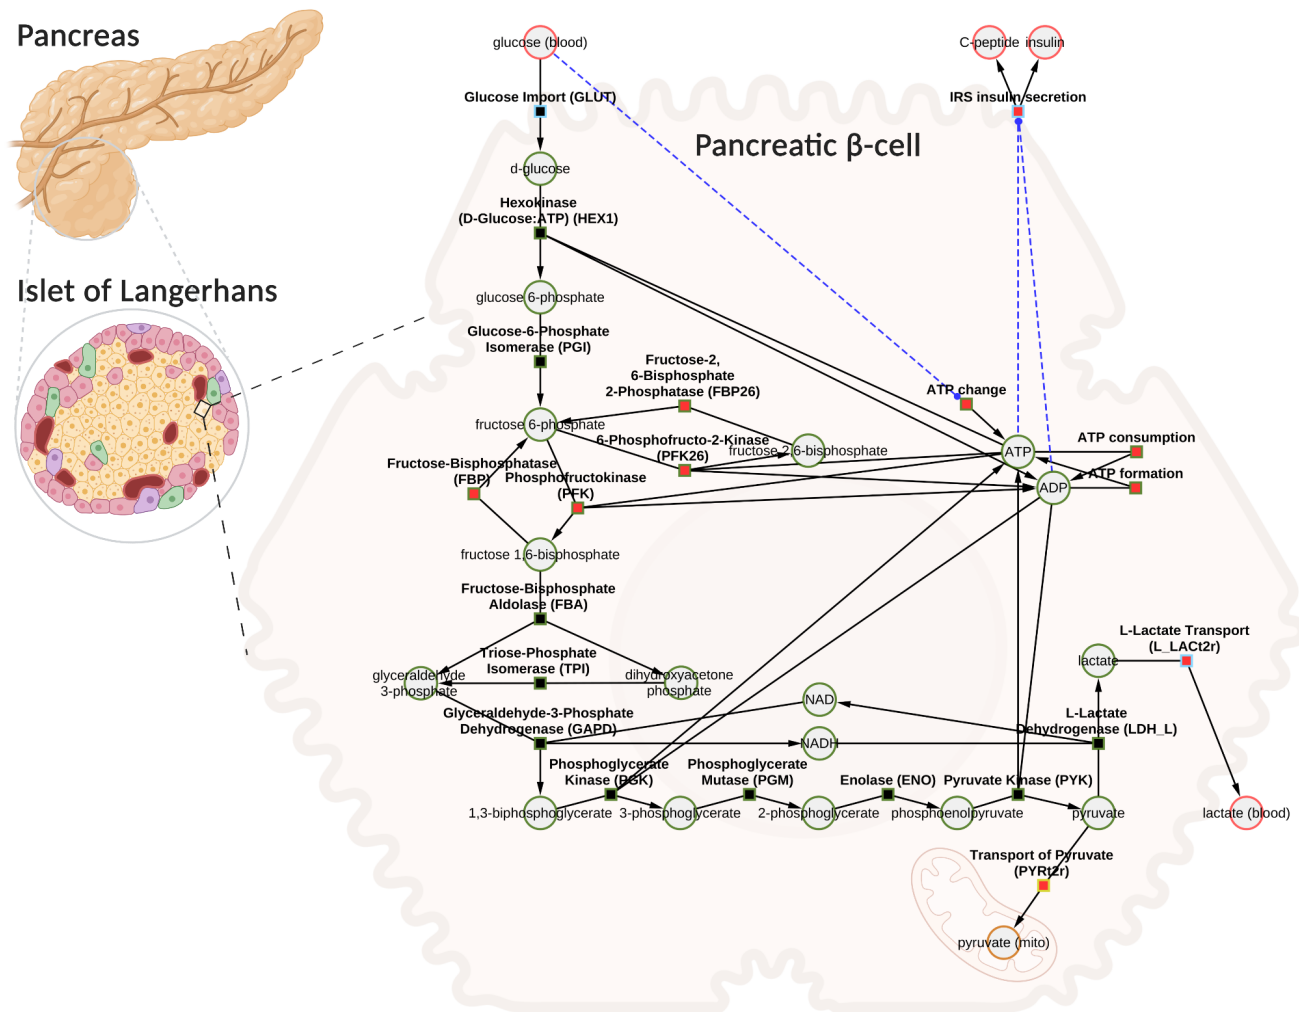

**Figure 3. Computational model of glucose-stimulated insulin secretion (GSIS) in the pancreatic  $\beta$ -cell.** The model consists of glycolysis and insulin secretion coupled to the energy state (ATP/ADP ratio). The GLUT transporter facilitates the uptake of glucose from the plasma into the cell. Glucose undergoes phosphorylation and the subsequent reactions lead to the production of pyruvate. Pyruvate can either be converted to lactate and exported into blood or transported to the mitochondria where it serves as a fuel source for the production of tricarboxylic acid cycle (TCA) intermediates (the TCA cycle has not been modeled). Depending on the external glucose concentrations, glycolysis intermediates and energy metabolites such as ATP, ADP, NAD, and NADH change. An increase in the ATP/ADP ratio as a result of changes in glucose triggers the cascade of signaling mechanisms that promote insulin secretion by the pancreatic  $\beta$ -cell. Phosphate, water, and hydrogen ions have been omitted from the diagram for clarity (but are included in the model for mass and charge balance). The network diagram was created using CysBML (König et al., 2012b). Created with BioRender.com.



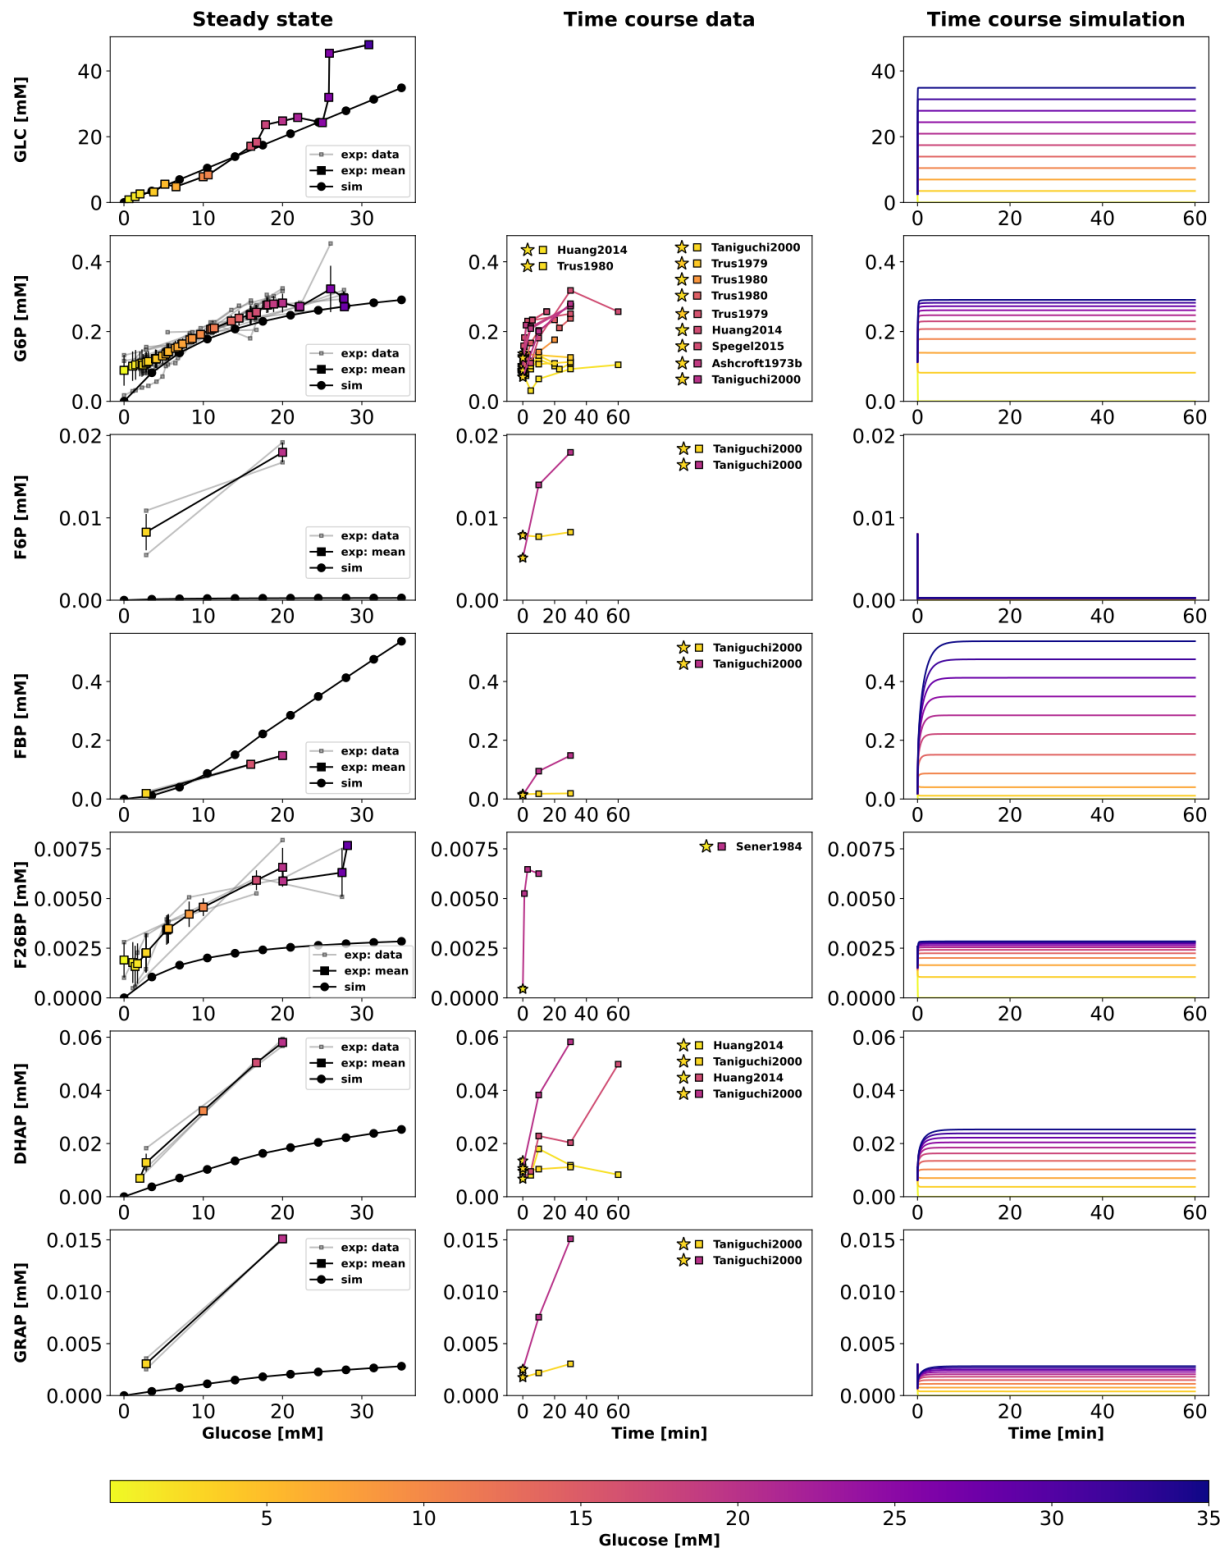

**Figure 5. Effect of variations in blood glucose on glycolytic intermediates.** (left column) Dose-response simulations. Glucose scan was performed for the calculation of steady-state concentration of metabolites in the model. The steady-state concentrations predicted by the model at various glucose doses were compared with the normalized values of experimental measurements; (middle column) Time course experimental data. Time course values of glycolytic intermediates and cofactors from multiple experimental studies carried out at different incubation doses of glucose; ( $\star$ ) in the legend indicates the pre-incubation glucose dose. (right column) Time course simulations. The effect of variation in blood glucose dose on the transient concentration of metabolites. GLC: glucose, G6P: glucose 6-phosphate, F6P: fructose 6-phosphate, FBP: fructose 1,6-bisphosphate, F26BP: fructose 2,6-bisphosphate, DHAP: dihydroxyacetone phosphate, GRAP: glyceraldehyde 3-phosphate. Data from (Akhtar et al., 1977; Ashcroft et al., 1970, 1973b; Giroix et al., 1984; Huang and Joseph, 2014; Liu et al., 1998, 2004; Malmgren et al., 2013; Matschinsky and Ellerman, 1968; Miwa et al., 2000; Spégel et al., 2015; Sener et al., 1984; Taniguchi et al., 2000; Trus et al., 1979, 1980).



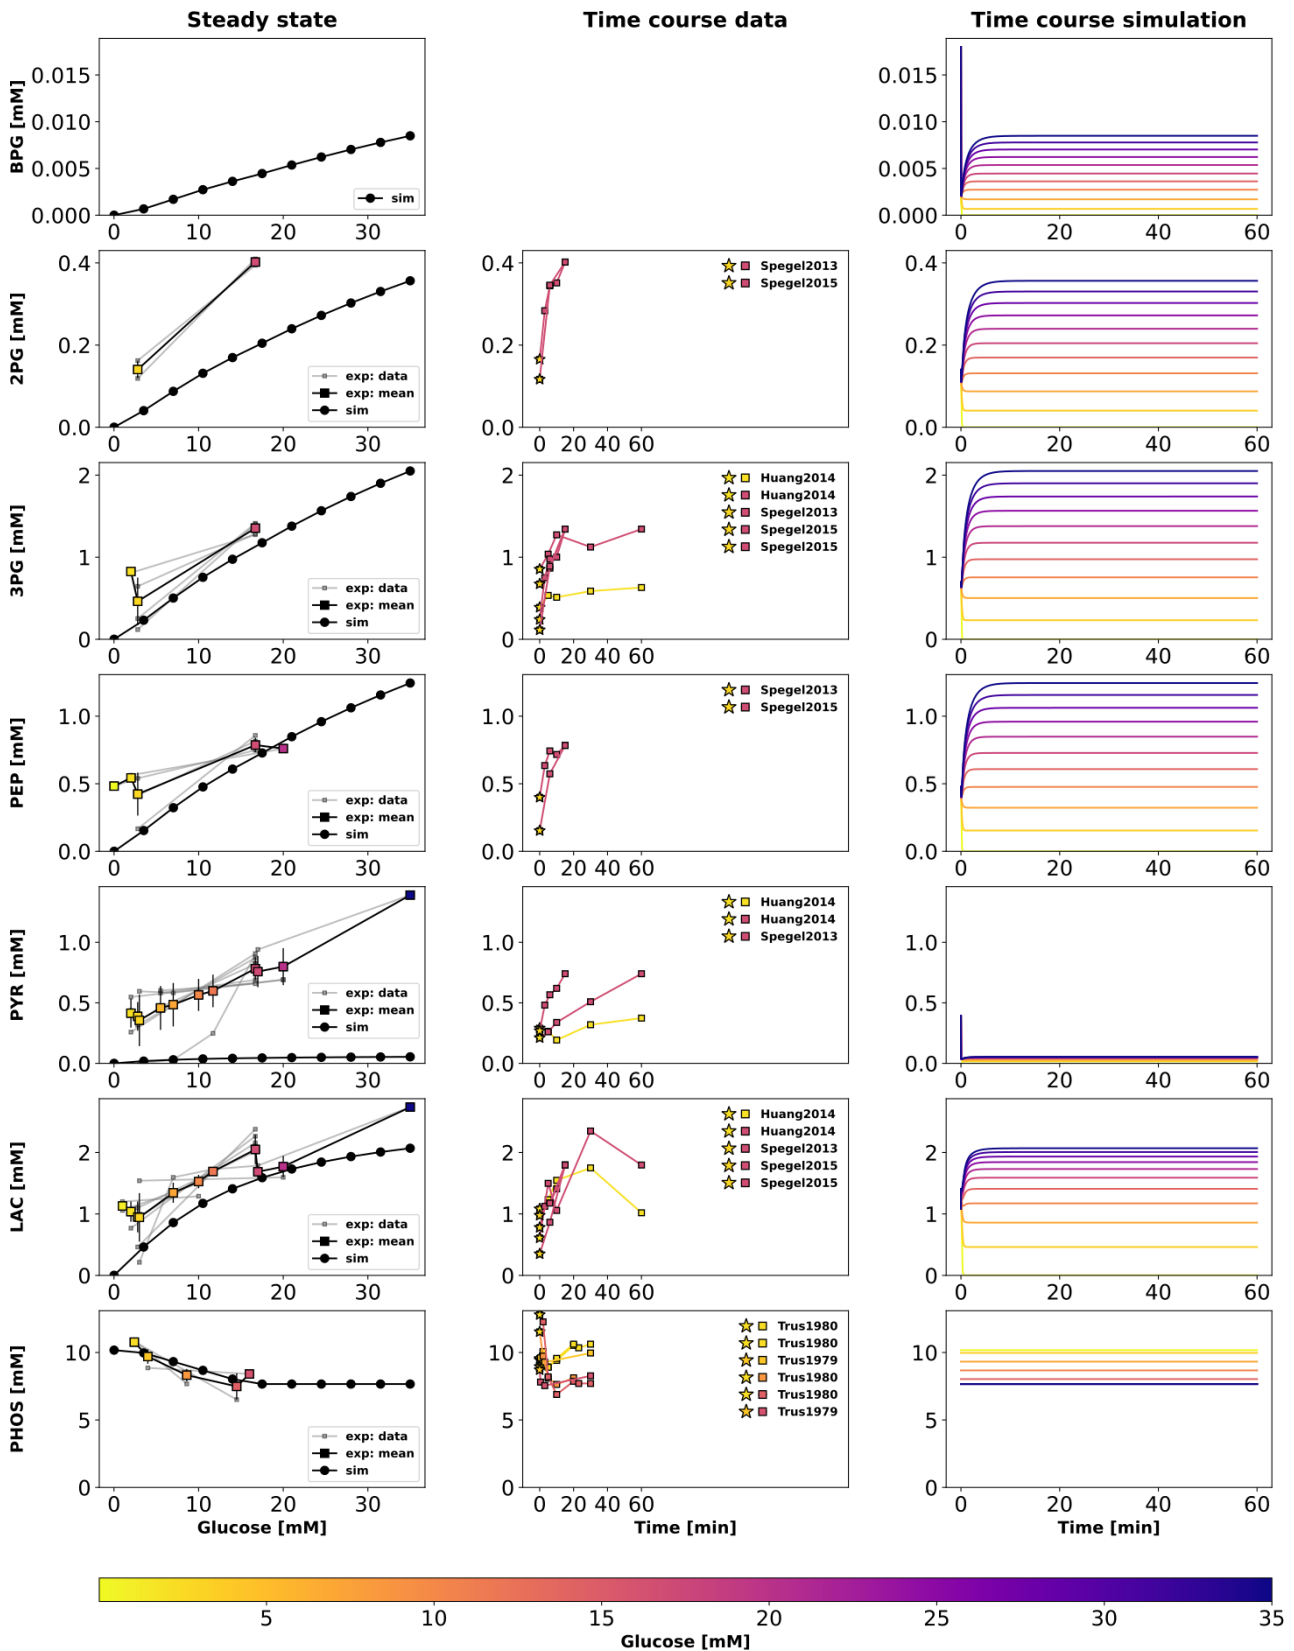

**Figure 6. Effect of variations in blood glucose on glycolytic intermediates.** The plot is analogous to Fig. 5. BPG: 1,3-biphosphoglycerate, 2PG: 2-phosphoglycerate, 3PG: 3-phosphoglycerate, PEP: phosphoenolpyruvate, PYR: pyruvate, LAC: lactate, PHOS: phosphate. Data from (Ashcroft and Christie, 1979; Ewart et al., 1983; Guay et al., 2013; Hedekov et al., 1987; Huang and Joseph, 2014; Malinowski et al., 2020; Malmgren et al., 2013; Spéjel et al., 2013, 2015; Sugden and Ashcroft, 1977; Trus et al., 1979, 1980).

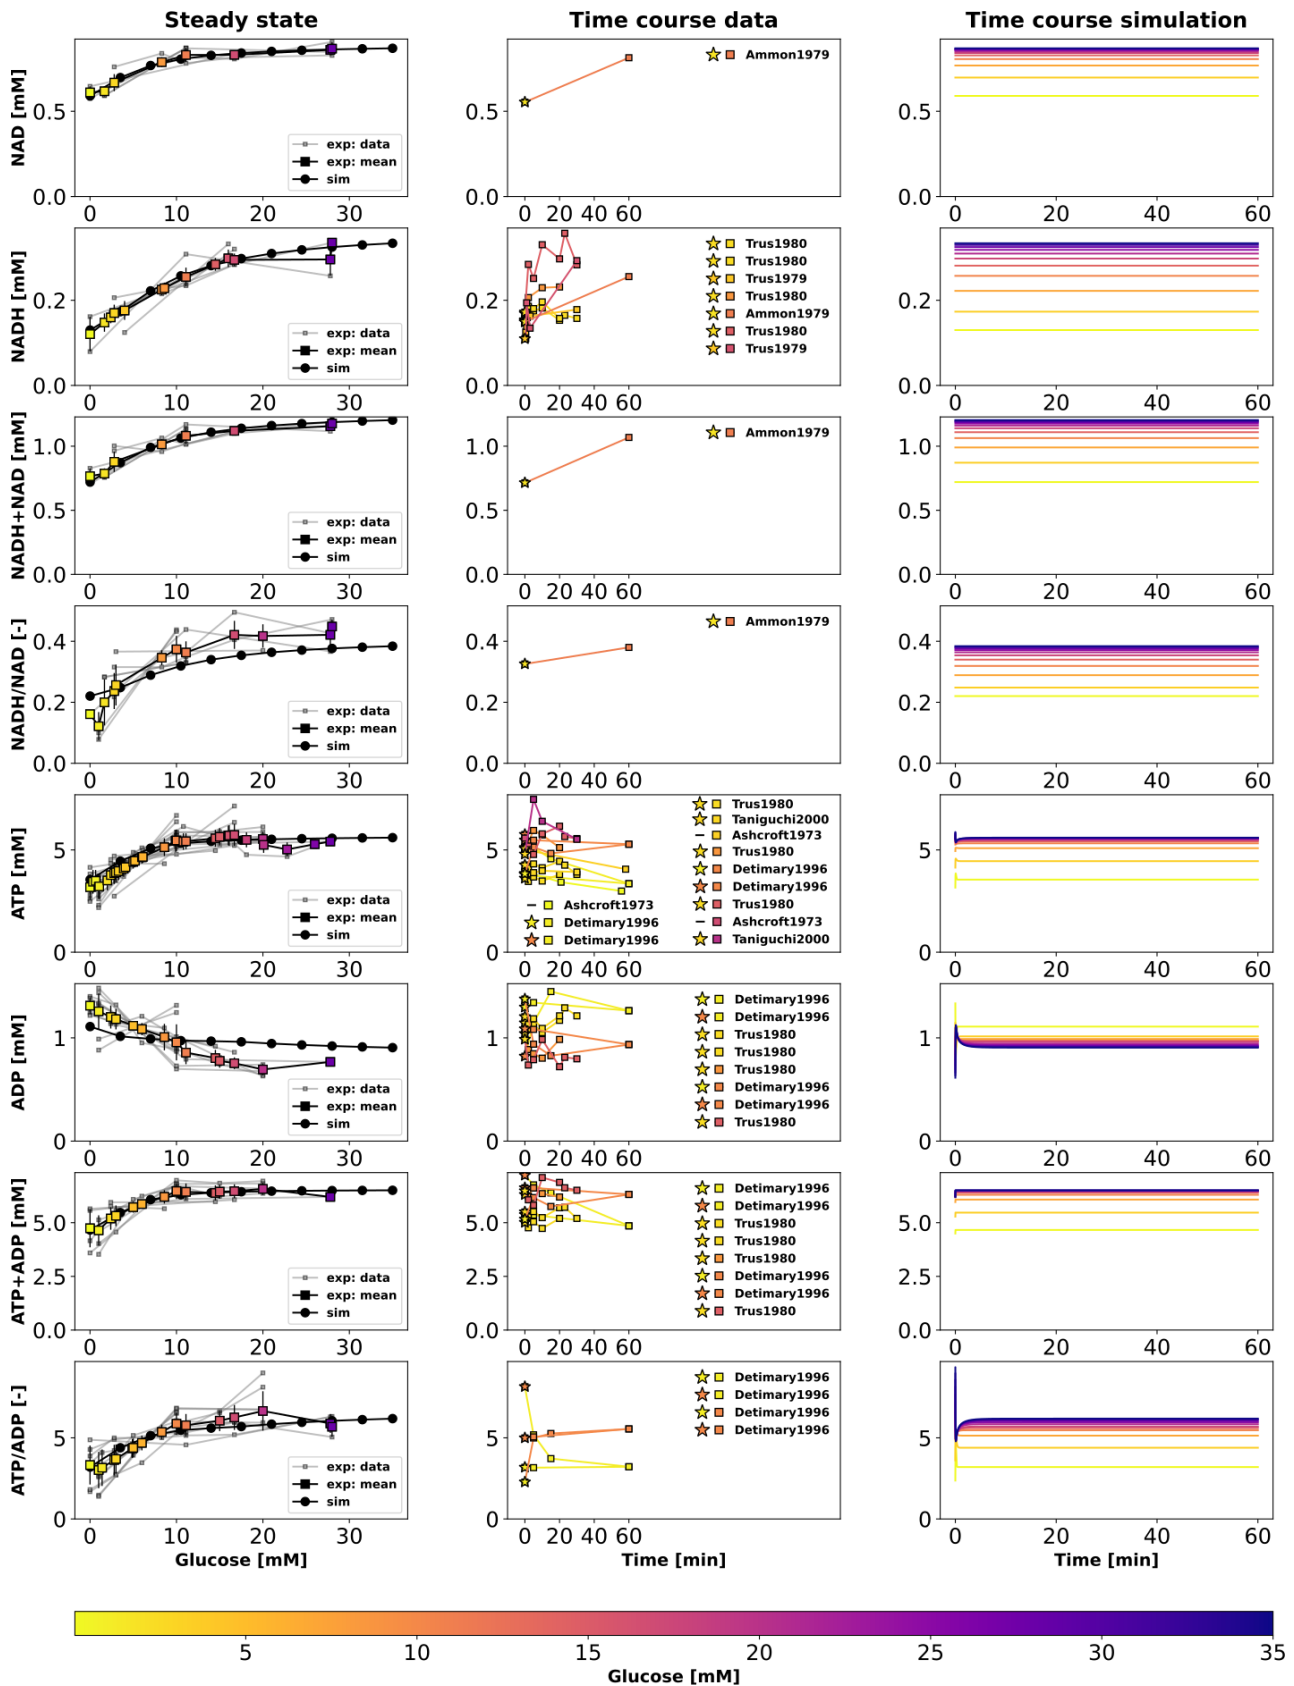

**Figure 7. Effect of variations in blood glucose on glycolytic cofactors.** The plot is analogous to Fig. 5. NAD: nicotinamide adenine dinucleotide, NADH: nicotinamide adenine dinucleotide reduced. ATP: adenosine triphosphate, ADP: adenosine diphosphate Data from (Ammon et al., 1979, 1998; Ashcroft et al., 1970; Detimary et al., 1996, 1998; Guay et al., 2013; Hedekov et al., 1987; Lamontagne et al., 2009; Malaisse et al., 1978; Malaisse and Sener, 1987; Matschinsky and Ellerman, 1968; Matschinsky et al., 1976; Sener et al., 1978; Spégel et al., 2015; Taniguchi et al., 2000; Trus et al., 1979, 1980).

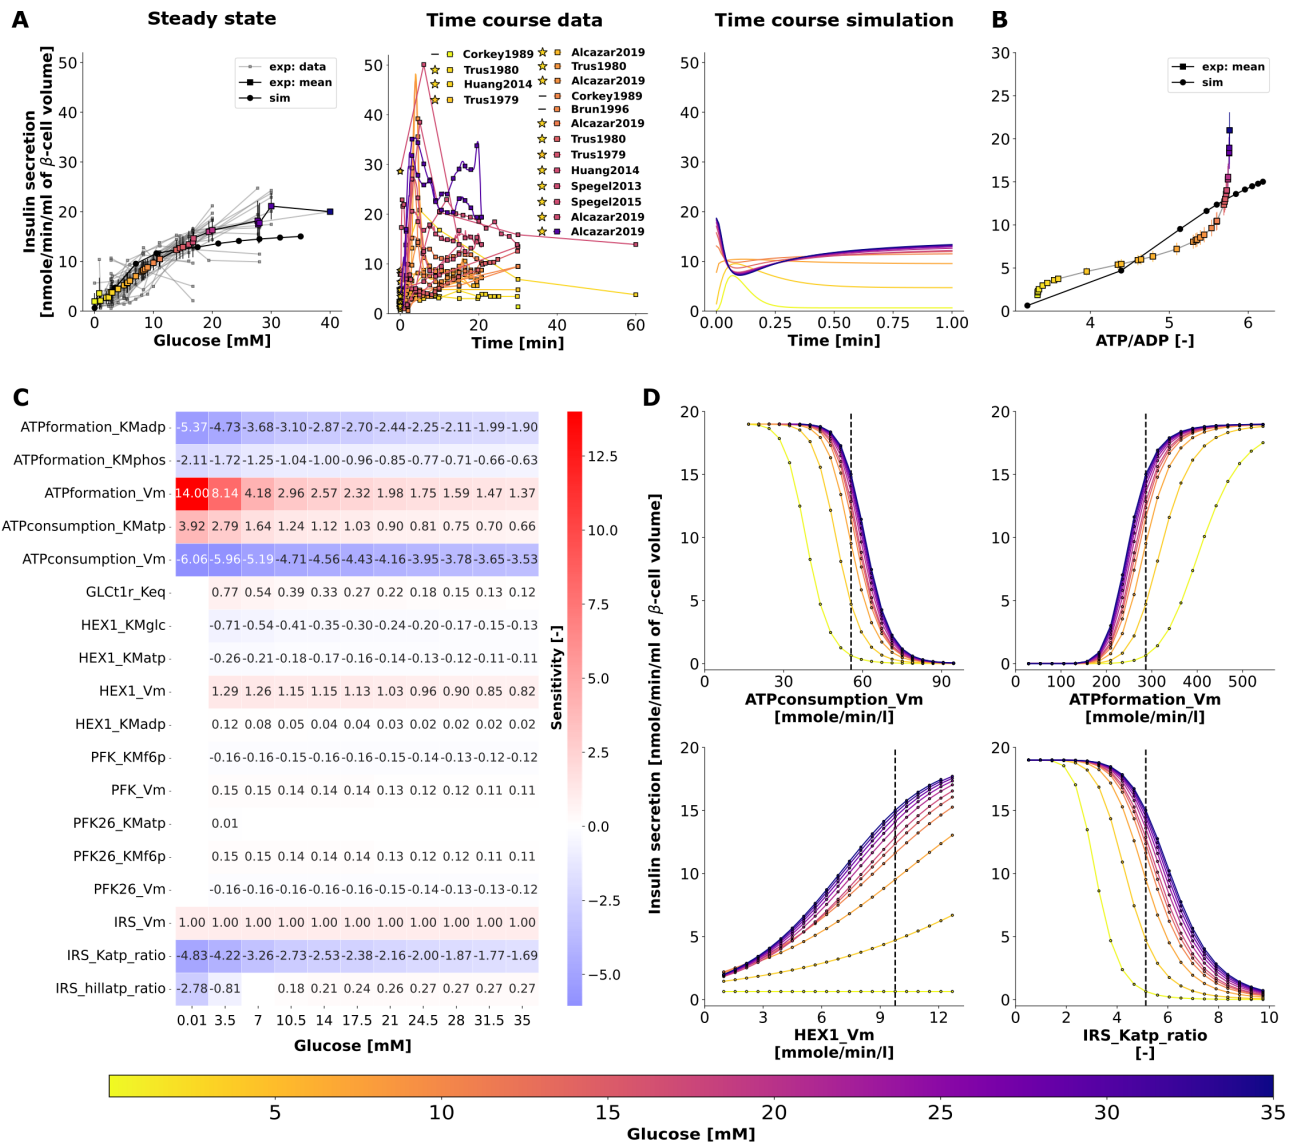

**Figure 8. (A) Effect of variations in blood glucose on insulin secretion.** The plot is analogous to Fig. 5. Data from (Alcazar and Buchwald, 2019; Ammon et al., 1998; Ashcroft et al., 1973a; Brun et al., 1996; Corkey et al., 1989; Detimary et al., 1996, 1998; Ewart et al., 1983; Guay et al., 2013; Hedekov et al., 1987; Huang and Joseph, 2014; Johnson et al., 2007; Lamontagne et al., 2009; Liu et al., 1998, 2004; Meglasson and Matschinsky, 1986; Sener et al., 1978; Spéjel et al., 2013, 2015; Trus et al., 1979, 1980; Xu et al., 2008a,b). **(B) Effect of change in energy state (ATP/ADP ratio) of the  $\beta$ -cell on insulin secretion.** The rate of insulin release in response to changes in ATP/ADP ratio is shown. **(C) Sensitivity analysis indicating the effect of perturbation in model parameters on insulin secretion.** Heatmap illustrating the values of scaled local sensitivities illustrating the effect of parameter perturbations on the amount of insulin secretion at varying glucose doses. Highly sensitive values are colored in red and blue. The parameters which cause less than 1% change in insulin response for 10% perturbation were not displayed for clarity. For more details, please refer to Sec. 2.6. **(D) Effect of change in model parameters on insulin secretion as a function of glucose dose.** The rate of insulin secretion in response to perturbation in the values of ATPconsumption\_Vm, HEX1\_Vm, IRS\_Katp\_ratio, IRS\_hillKatp\_ratio. The vertical line indicates the model value.
